# Supplementary material for: A systematic review of the validity of patient derived xenograft (PDX) models: the implications for translational research and personalised medicine
Source: PubMed Central journal article supplement (PMC6252062; doi:10.7717/peerj.5981), 2018-11-21
Supplement: peerj-06-5981-s002.pdf [file peerj-06-5981-s002.pdf]

**Supplemental Table S2: Search strategies and inclusion/exclusion criteria**

conducted on 12/7/17

|                                                                                                                                                                                                                                                                                                                                                                                                                                                              |
|--------------------------------------------------------------------------------------------------------------------------------------------------------------------------------------------------------------------------------------------------------------------------------------------------------------------------------------------------------------------------------------------------------------------------------------------------------------|
| <p><b>Embase &lt;1974 to 2017 July 11&gt;</b></p> <ol style="list-style-type: none"><li>1 xenograft/ (40270)</li><li>2 (xenograft\$ or explant\$ or explants).ti,ab. (123979)</li><li>3 1 or 2 (133527)</li><li>4 ((patient\$ or human\$) adj2 derived).ti,ab. (44918)</li><li>5 3 and 4 (5520)</li><li>6 conference\$.pt. (3369534)</li><li>7 5 not 6 (2608)</li></ol>                                                                                      |
| <p><b>MEDLINE(R) &lt;1946 to June Week 5 2017&gt;</b></p> <ol style="list-style-type: none"><li>1 Heterografts/ (3905)</li><li>2 (xenograft\$ or explant\$ or explants).ti,ab. (79098)</li><li>3 1 or 2 (81226)</li><li>4 ((patient\$ or human\$) adj2 derived).ti,ab. (28090)</li><li>5 3 and 4 (1964)</li></ol>                                                                                                                                            |
| <p><b>MEDLINE(R) Epub Ahead of Print &lt;July 11, 2017&gt;,<br/>MEDLINE(R) In-Process &amp; Other Non-Indexed Citations &lt;July 11, 2017&gt;,<br/>MEDLINE(R) Daily Update &lt;July 10, 2017&gt;</b></p> <ol style="list-style-type: none"><li>1 Heterografts/ (12)</li><li>2 (xenograft\$ or explant\$ or explants).ti,ab. (10387)</li><li>3 1 or 2 (10392)</li><li>4 ((patient\$ or human\$) adj2 derived).ti,ab. (4102)</li><li>5 3 and 4 (742)</li></ol> |

Inclusion / Exclusion criteria

|                                                  | <b>Include</b>                                                                                                                                                                                                                                                                                                                                                                                                                        | <b>Exclude</b>                                                                                                                                                                                                                                                                                                                                            |
|--------------------------------------------------|---------------------------------------------------------------------------------------------------------------------------------------------------------------------------------------------------------------------------------------------------------------------------------------------------------------------------------------------------------------------------------------------------------------------------------------|-----------------------------------------------------------------------------------------------------------------------------------------------------------------------------------------------------------------------------------------------------------------------------------------------------------------------------------------------------------|
| <b>Population</b>                                | Murine xenografts derived from human carcinoma tissues of breast, colon, lung or prostate (fragments or freshly isolated primary cells at $\leq 3$ passages)                                                                                                                                                                                                                                                                          | <p>Metastatic tumours</p> <p>Lymphoma, leukaemia, sarcomas, melanoma, brain tumours (glioma, medullablastoma etc.), squamous cell carcinoma, cystic carcinoma, teratoma</p> <p>Xenografts derived from cell lines or primary samples <math>\geq 4</math> passages (or unclear passage) or genetically manipulated cells</p> <p>Rat, canine xenografts</p> |
| <b>Outcomes</b>                                  | <p>Validation:</p> <ol style="list-style-type: none"> <li>1. Xenograft and tumour histology</li> <li>2. Confirmation of human tumour cells (exclusion of mouse cells and normal human cells for primary outgrowth only)</li> <li>3. Confirmation of tissue type</li> <li>4. Confirmation of cellular type</li> <li>5. Confirmation of tumour markers</li> <li>6. Confirmation of lymphoma or EBV (T cell, B cell, NK cell)</li> </ol> |                                                                                                                                                                                                                                                                                                                                                           |
| <b>Outcomes For extraction but not inclusion</b> | <ol style="list-style-type: none"> <li>7. Engraftment rate (primary outgrowth); percentage of biopsies which develop xenografts</li> <li>8. Latency</li> <li>9. Percentage of biopsies resulting in stable lines</li> <li>10. Percentage of biopsies resulting in lymphomas</li> <li>11. Clinical characteristics of patient tumour tissue</li> </ol>                                                                                 |                                                                                                                                                                                                                                                                                                                                                           |
