# Supplementary material for: A systematic review of the validity of patient derived xenograft (PDX) models: the implications for translational research and personalised medicine
Source: PubMed Central journal article supplement (PMC6252062; doi:10.7717/peerj.5981), 2018-11-21
Supplement: peerj-06-5981-s004.pdf [file peerj-06-5981-s004.pdf]

**Supplemental Table S4: Excluded studies and reasons for exclusion**

|                              | Reference                                                                                                                                                                                                                                                        |
|------------------------------|------------------------------------------------------------------------------------------------------------------------------------------------------------------------------------------------------------------------------------------------------------------|
| Duplicate                    | Jin, K., et al. Antitumor effects of FP3 in combination with capecitabine on PDDT xenograft models of primary colon carcinoma and related lymphatic and hepatic metastases 2012 Cancer Biology & Therapy 13(9) 737-44                                            |
| Exclude [ $\geq 3$ passages] | Drews-Elger, K., et al. Primary breast tumor-derived cellular models: Characterization of tumorigenic, metastatic, and cancer-associated fibroblasts in dissociated tumor (DT) cultures 2014 Breast Cancer Research and Treatment 144(3) 503-517                 |
|                              | Gebauer, F., et al. Establishment and characterization of a pair of patient-derived human non-small cell lung cancer cell lines from a primary tumor and corresponding lymph node metastasis 2016 Anticancer Research 36(4) 1507-1518                            |
|                              | Timofeeva, O. A., et al. Conditionally reprogrammed normal and primary tumor prostate epithelial cells: A novel patient-derived cell model for studies of human prostate cancer 2017 Oncotarget 8(14) 22741-22758                                                |
|                              | Amendt, C., et al. 2014 Clinical cancer research: an official journal of the American Association for Cancer Research 20(17) 4478-87                                                                                                                             |
|                              | Mather, J., et al. Isolation of cancer stem like cells from human adenosquamous carcinoma of the lung supports a monoclonal origin from a multipotential tissue stem cell. 2013 PloS one 8(12) e79456                                                            |
|                              | Silvers, C., et al. A novel in vitro assay of tumor-initiating cells in xenograft prostate tumors. 2010 The Prostate 70(13) 1379-87                                                                                                                              |
| Exclude [cell line]          | Adumeau, P., et al. A pretargeted approach for the multimodal PET/NIRF imaging of colorectal cancer 2016 Theranostics 6(12) 2267-2277                                                                                                                            |
|                              | Amir, S., et al. MSF-A interacts with hypoxia-inducible factor-1 $\alpha$ and augments hypoxia-inducible factor transcriptional activation to affect tumorigenicity and angiogenesis 2006 Cancer Research 66(2) 856-866                                          |
|                              | Anderson, G. R., et al. PIK3CA mutations enable targeting of a breast tumor dependency through mTOR-mediated MCL-1 translation 2016 Science Translational Medicine 8: 369ra175                                                                                   |
|                              | Balko, J. M., et al. Triple-negative breast cancers with amplification of JAK2 at the 9p24 locus demonstrate JAK2-specific dependence 2016 Science Translational Medicine 8(334) doi:10.1126/scitranslmed.aad3001                                                |
|                              | Bansal, N., et al. BMI-1 targeting interferes with patient-derived tumor-initiating cell survival and tumor growth in prostate cancer 2016 Clinical Cancer Research 22(24) 6176-6191                                                                             |
|                              | Boisgerault, N., et al. Natural oncolytic activity of live-attenuated measles virus against human lung and colorectal adenocarcinomas 2013 BioMed Research International <a href="https://doi.org/10.1155/2013/387362">https://doi.org/10.1155/2013/387362</a> . |
|                              | Calon, A., et al. Stromal gene expression defines poor-prognosis subtypes in colorectal cancer 2015 Nature Genetics 47(4) 320-329                                                                                                                                |
|                              | Cardo-Vila, M., et al. Interleukin-11 Receptor Is a Candidate Target for Ligand-Directed Therapy in Lung Cancer: Analysis of Clinical Samples and BMTP-11 Preclinical Activity 2016 American Journal of Pathology 186(8) 2162-2170                               |
|                              | Chatalic, K. L. S., et al. A novel <sup>111</sup> In-labeled anti-prostate-specific membrane antigen nanobody for targeted SPECT/CT imaging of prostate cancer 2015 Journal of Nuclear Medicine 56(7) 1094-1099                                                  |
|                              | Fox, E. M., et al. Autocrine IGF-I/insulin receptor axis compensates for inhibition of AKT in ER-positive breast cancer cells with resistance to estrogen deprivation 2013 Breast Cancer Research 15(4) R55                                                      |
|                              | Giedt, R. J., et al. Computational imaging reveals mitochondrial morphology as a biomarker of cancer phenotype and drug response 2016 Scientific Reports 6: 32985                                                                                                |
|                              | Gilani, R. A., et al. UM-164: A potent c-Src/p38 kinase inhibitor with in vivo activity against triple-negative breast cancer 2016 Clinical Cancer Research 22(20) 5087-5096                                                                                     |

|                                                                                                                                                                                                                                                                              |
|------------------------------------------------------------------------------------------------------------------------------------------------------------------------------------------------------------------------------------------------------------------------------|
| Hong, S. N., et al. Epigenetic silencing of NDRG2 promotes colorectal cancer proliferation and invasion 2016 <i>Journal of Gastroenterology and Hepatology (Australia)</i> 31(1) 164-171                                                                                     |
| Hultberg, A., et al. Depleting MET-expressing tumor cells by ADCC provides a therapeutic advantage over inhibiting HGF/MET signaling 2015 <i>Cancer Research</i> 75(16) 3373-3383                                                                                            |
| Hydbring, P., et al. Cell-Cycle-Targeting MicroRNAs as Therapeutic Tools against Refractory Cancers 2017 <i>Cancer Cell</i> 31(4) 576-590.e8                                                                                                                                 |
| Jhan, J. R. and Andrechek, E. R. Effective personalized therapy for breast cancer based on predictions of cell signaling pathway activation from gene expression analysis 2017 <i>Oncogene</i> 36(25) 3553-3561                                                              |
| Khurana, A., et al. Matrix detachment and proteasomal inhibitors diminish Sulf-2 expression in breast cancer cell lines and mouse xenografts 2013 <i>Clinical and Experimental Metastasis</i> 30(4) 407-415                                                                  |
| Kienast, Y., et al. Ang-2-VEGF-A crossmab, a novel bispecific human IgG1 antibody Blocking VEGF-A and Ang-2 functions simultaneously, mediates potent antitumor, antiangiogenic, and antimetastatic efficacy 2013 <i>Clinical Cancer Research</i> 19(24) 6730-6740           |
| Liu, H., et al. c-Myc alteration determines the therapeutic response to FGFR inhibitors 2017 <i>Clinical Cancer Research</i> 23(4) 974-984                                                                                                                                   |
| Lu, P. H., et al. Aqueous Oldenlandia diffusa extracts inhibits colorectal cancer cells via activating AMP-activated protein kinase signalings 2016 <i>Oncotarget</i> 7(29) 45889-45900                                                                                      |
| Ma, R., et al. Estrogen Receptor B as a therapeutic target in breast cancer stem cells 2017 <i>Journal of the National Cancer Institute</i> 109(3) djw236. doi: 10.1093/jnci/djw236                                                                                          |
| Marques, R. B., et al. High efficacy of combination therapy using PI3K/AKT inhibitors with androgen deprivation in prostate cancer preclinical models 2015 <i>European Urology</i> 67(6) 1177-1185                                                                           |
| Mittal, K., et al. Amplified centrosomes and mitotic index display poor concordance between patient tumors and cultured cancer cells 2017 <i>Scientific Reports</i> 7: 43984. doi:10.1038/srep43984.                                                                         |
| Nakahara, T., et al. YM155, a novel survivin suppressant, enhances taxane-induced apoptosis and tumor regression in a human Calu 6 lung cancer xenograft model 2011 <i>Anti-Cancer Drugs</i> 22(5) 454-462                                                                   |
| Navab, R., et al. Integrin alpha11beta1 regulates cancer stromal stiffness and promotes tumorigenicity and metastasis in non-small cell lung cancer 2016 <i>Oncogene</i> 35(15) 1899-1908                                                                                    |
| Nylandsted, J., et al. Eradication of glioblastoma, and breast and colon carcinoma xenografts by Hsp70 depletion 2002 <i>Cancer Research</i> 62(24) 7139-7142                                                                                                                |
| Ogitani, Y., et al. Bystander killing effect of DS-8201a, a novel anti-human epidermal growth factor receptor 2 antibody-drug conjugate, in tumors with human epidermal growth factor receptor 2 heterogeneity 2016 <i>Cancer Science</i> 107: 1039-1046                     |
| Oikonomou, E., et al. Newly established tumourigenic primary human colon cancer cell lines are sensitive to TRAIL-induced apoptosis in vitro and in vivo 2007 <i>British Journal of Cancer</i> 97(1) 73-84                                                                   |
| Pavet, V., et al. Multivalent DR5 Peptides Activate the TRAIL Death Pathway and Exert Tumoricidal Activity 2010 <i>Cancer Research</i> 70(3) 1101-1110                                                                                                                       |
| Puvirajesinghe, T. M., et al. Identification of p62/SQSTM1 as a component of non-canonical Wnt VANGL2-JNK signalling in breast cancer 2016 <i>Nature Communications</i> 7(10318) <a href="https://dx.doi.org/10.1038/ncomms10318">https://dx.doi.org/10.1038/ncomms10318</a> |
| Romanelli, A., et al. Inhibiting aurora kinases reduces tumor growth and suppresses tumor recurrence after chemotherapy in patient-derived triple-negative breast cancer xenografts 2012 <i>Molecular Cancer Therapeutics</i> 11(12) 2693-2703                               |
| Vallespi, M. G., et al. Antitumor efficacy, pharmacokinetic and biodistribution studies of the anticancer peptide CIGB-552 in mouse models 2014 <i>Journal of Peptide Science</i> 20: 10.1002/psc.2676.                                                                      |
| Wakeling, A. E., et al. ZD1839 (Iressa): An orally active inhibitor of epidermal growth factor signaling with potential for cancer therapy 2002 <i>Cancer Research</i> 62(20) 5749-5754                                                                                      |
| Wang, F., et al. Selective cytotoxicity to HER2-positive tumor cells by a recombinant e23sFv-TD-tBID protein containing a furin cleavage sequence 2010 <i>Clinical Cancer Research</i> 16(8) 2284-2294                                                                       |

|                                      |                                                                                                                                                                                                                                                                                                                                                                                                                                                                                                                                                                                                                                                                                                                                                                                                                                                                                                                                                                                                                                                                                                                                                                                                                                                                                                                                                                                                                                                                                                                                                                                                                                                                                             |
|--------------------------------------|---------------------------------------------------------------------------------------------------------------------------------------------------------------------------------------------------------------------------------------------------------------------------------------------------------------------------------------------------------------------------------------------------------------------------------------------------------------------------------------------------------------------------------------------------------------------------------------------------------------------------------------------------------------------------------------------------------------------------------------------------------------------------------------------------------------------------------------------------------------------------------------------------------------------------------------------------------------------------------------------------------------------------------------------------------------------------------------------------------------------------------------------------------------------------------------------------------------------------------------------------------------------------------------------------------------------------------------------------------------------------------------------------------------------------------------------------------------------------------------------------------------------------------------------------------------------------------------------------------------------------------------------------------------------------------------------|
|                                      | <p>Wang, J., et al. ABBV-399, a c-Met antibody-drug conjugate that targets both MET-amplified and c-Met-overexpressing tumors, irrespective of MET pathway dependence 2017 Clinical Cancer Research 23(4) 992-1000</p> <p>Wang, L., et al. Autophagy inhibition sensitizes WYE-354-induced anti-colon cancer activity in vitro and in vivo 2016 Tumor Biology 37(9) 11743-11752</p> <p>Weir, H. M., et al. AZD9496: An oral estrogen receptor inhibitor that blocks the growth of ER-positive and ESR1-mutant breast tumors in preclinical models 2016 Cancer Research 76(11) 3307-3318</p> <p>Zhao, Y., et al. Activation of P-TEFb by Androgen Receptor-Regulated Enhancer RNAs in Castration-Resistant Prostate Cancer 2016 Cell Reports 15(3) 599-610</p>                                                                                                                                                                                                                                                                                                                                                                                                                                                                                                                                                                                                                                                                                                                                                                                                                                                                                                                               |
| <b>Exclude [conference abstract]</b> | <p>Fiebig, H.H., et al. Do gene signatures predict effectiveness of bevacizumab and cetuximab? 2008 Journal of Clinical Oncology 26(15) 14519</p>                                                                                                                                                                                                                                                                                                                                                                                                                                                                                                                                                                                                                                                                                                                                                                                                                                                                                                                                                                                                                                                                                                                                                                                                                                                                                                                                                                                                                                                                                                                                           |
| <b>Exclude [manipulation]</b>        | <p>Francescangeli, F., et al. Dynamic regulation of the cancer stem cell compartment by Cripto-1 in colorectal cancer 2015 Cell Death and Differentiation 22(10) 1700-1713</p> <p>Green, J. L., et al. Paracrine Wnt signaling both promotes and inhibits human breast tumor growth 2013 Proceedings of the National Academy of Sciences of the United States of America 110(17) 6991-6996</p> <p>Hanna, C., et al. Labeling of Breast Cancer Patient-derived Xenografts with Traceable Reporters for Tumor Growth and Metastasis Studies 2016 Journal of Visualized Experiments 117: 10.3791/54944. doi:10.3791/54944.</p> <p>Picco, G., et al. A diphtheria toxin resistance marker for in vitro and in vivo selection of stably transduced human cells 2015 Scientific reports 5: 14721</p> <p>Powell, E., et al. p53 deficiency linked to B cell translocation gene 2 (BTG2) loss enhances metastatic potential by promoting tumor growth in primary and metastatic sites in patient-derived xenograft (PDX) models of triple-negative breast cancer 2016 Breast Cancer Research 18: 13. doi:10.1186/s13058-016-0673-9.</p> <p>Sflomos, G., et al. A Preclinical Model for ERalpha-Positive Breast Cancer Points to the Epithelial Microenvironment as Determinant of Luminal Phenotype and Hormone Response 2016 Cancer Cell 29(3) 407-422</p> <p>Shangguan, W., et al. Endothelium originated from colorectal cancer stem cells constitute cancer blood vessels 2017 Cancer Science 108: 1357-1367</p> <p>Thiagarajan, P. S., et al. Development of a fluorescent reporter system to delineate cancer stem cells in triple-negative breast cancer 2015 Stem Cells 33(7) 2114-2125</p> |
| <b>Exclude [Non-English]</b>         | <p>Hu, Y. R., et al. Establishment of patient-derived xenotransplantation models for non-small cell lung cancer in immune deficient mice 2009 Chinese Journal of Cancer 28: 890-3</p> <p>Karpel-Massler, G., et al. Inhibition of Mitochondrial Matrix Chaperones and Antiapoptotic Bcl-2 Family Proteins Empower Antitumor Therapeutic Responses 2017 Cancer Research 77(13) 3513-3526</p>                                                                                                                                                                                                                                                                                                                                                                                                                                                                                                                                                                                                                                                                                                                                                                                                                                                                                                                                                                                                                                                                                                                                                                                                                                                                                                 |
| <b>Exclude [not mouse model]</b>     | <p>Dayanc, B. E., et al. Enhanced sensitivity of colon tumour cells to natural killer cell cytotoxicity after mild thermal stress is regulated through HSF1-mediated expression of MICA 2013 International Journal of Hyperthermia 29(5) 480-490</p> <p>Gelfo, V., et al. A module of inflammatory cytokines defines resistance of colorectal cancer to EGFR inhibitors 2016 Oncotarget 7(44) 72167-72183</p> <p>Jaworski, F. M., et al. In Vivo Hemin Conditioning Targets the Vascular and Immunologic Compartments and Restrains Prostate Tumor Development 2017 Clinical Cancer Research: DOI: 10.1158/1078-0432.CCR-17-0112</p> <p>Jensen, M. R., et al. NVP-AUY922: a small molecule HSP90 inhibitor with potent antitumor activity in preclinical breast cancer models 2008 Breast cancer research : BCR 10(2) R33</p> <p>Jhuraney, A., et al. PAXIP1 Potentiates the Combination of WEE1 Inhibitor AZD1775 and Platinum Agents in Lung Cancer 2016 Molecular Cancer Therapeutics 15(7) 1669-81</p> <p>Mascini, N. E., et al. The use of mass spectrometry imaging to predict treatment response of patient-derived xenograft models of triple-negative breast cancer 2015 Journal of Proteome Research 14(2) 1069-1075</p>                                                                                                                                                                                                                                                                                                                                                                                                                                                          |

|                                            |                                                                                                                                                                                                                                                                                |
|--------------------------------------------|--------------------------------------------------------------------------------------------------------------------------------------------------------------------------------------------------------------------------------------------------------------------------------|
|                                            | Roman-Roman, P., et al. Modeling tumor growth in the presence of a therapy with an effect on rate growth and variability by means of a modified Gompertz diffusion process 2016 Journal of Theoretical Biology 407: 1-17                                                       |
|                                            | Shen, A., et al. C-Myc alterations confer therapeutic response and acquired resistance to c-Met inhibitors in MET-addicted cancers 2015 Cancer Research 75(21) 4548-4559                                                                                                       |
|                                            | Loning, T H and Mackenzie, I. C. Immunohistochemical studies of basal cell carcinomas transplanted into nude mice. 1986 Archives of dermatological research 279(1) 37-43                                                                                                       |
| Exclude [PDX methods only]                 | Bagby, S., et al. Development and Maintenance of a Preclinical Patient Derived Tumor Xenograft Model for the Investigation of Novel Anti-Cancer Therapies 2016 Journal of Visualized Experiments 115: doi: 10.3791/54393                                                       |
|                                            | DeRose, Y. S., et al. Patient-derived models of human breast cancer: Protocols for in vitro and in vivo applications in tumor biology and translational medicine 2013 Current Protocols in Pharmacology: 0 14: Unit14.23. doi:10.1002/0471141755.ph1423s60.                    |
|                                            | Park, D., et al. Establishment of Patient-derived Xenografts in Mice 2016 Bio protocol 6(22) pii: e2008. doi: 10.21769/BioProtoc.2008.                                                                                                                                         |
|                                            | Williams, E. S., et al. Generation of Prostate Cancer Patient Derived Xenograft Models from Circulating Tumor Cells 2015 Journal of visualized experiments: JoVE 104: 10.3791/53182.                                                                                           |
|                                            | Zhang, X. and Lewis, M. T. Establishment of Patient-Derived Xenograft (PDX) Models of Human Breast Cancer 2013 Current Protocols in Mouse Biology 3(1) 21-29                                                                                                                   |
| Exclude [PDX not derived in paper]         | Isella, C., et al. Stromal contribution to the colorectal cancer transcriptome 2015 Nature Genetics 47(4) 312-319                                                                                                                                                              |
|                                            | Li, H., et al. Integrated analysis of transcriptome in cancer patient-derived xenografts 2015 PLoS ONE 10(5) e0124780. <a href="https://doi.org/10.1371/journal.pone.0124780">https://doi.org/10.1371/journal.pone.0124780</a>                                                 |
|                                            | Maity, S. N., et al. Targeting of CYP17A1 Lyase by VT-464 Inhibits Adrenal and Intratumoral Androgen Biosynthesis and Tumor Growth of Castration Resistant Prostate Cancer 2016 Scientific Reports 6: 35354                                                                    |
| Exclude [purchased or validated elsewhere] | Akamatsu, S., et al. The placental gene PEG10 promotes progression of neuroendocrine prostate cancer 2015 Cell Reports 12(6) 922-936                                                                                                                                           |
|                                            | Amendt, C., et al. Association of EGFR expression level and cetuximab activity in patient-derived xenograft models of human non-small cell lung cancer 2014 Clinical cancer research: an official journal of the American Association for Cancer Research 20(17) 4478-4487     |
|                                            | Arcaroli, J. J., et al. Common PIK3CA mutants and a novel 3' UTR mutation are associated with increased sensitivity to saracatinib 2012 Clinical Cancer Research 18(9) 2704-2714                                                                                               |
|                                            | Arcaroli, J. J., et al. A NOTCH1 gene copy number gain is a prognostic indicator of worse survival and a predictive biomarker to a Notch1 targeting antibody in colorectal cancer 2016 International Journal of Cancer 138(1) 195-205                                          |
|                                            | Barbie, T. U., et al. Targeting an IKBKE cytokine network impairs triple-negative breast cancer growth 2014 Journal of Clinical Investigation 124(12) 5411-5423                                                                                                                |
|                                            | Belmont, P. J., et al. Resistance to dual blockade of the kinases PI3K and mTOR in KRAS-mutant colorectal cancer models results in combined sensitivity to inhibition of the receptor tyrosine kinase EGFR 2014 Science Signaling 7(351) ra107. DOI: 10.1126/scisignal.2005516 |
|                                            | Bharadwaj, U., et al. Drug-repositioning screening identified piperlongumine as a direct STAT3 inhibitor with potent activity against breast cancer 2015 Oncogene 34(11) 1341-53                                                                                               |
|                                            | Bieniasz, M., et al. Preclinical Efficacy of Ron Kinase Inhibitors Alone and in Combination with PI3K Inhibitors for Treatment of sfRon-Expressing Breast Cancer Patient-Derived Xenografts 2015 Clinical Cancer Research 21(24) 5588-5600                                     |
|                                            | Bihani, T., et al. Elacestrant (RAD1901), a Selective Estrogen Receptor Degradable (SERD), Has Antitumor Activity in Multiple ER <sup>+</sup> Breast Cancer Patient-derived Xenograft Models 2017 Clinical Cancer Research 23(16) 4793-804                                     |
|                                            | Bockhorn, J., et al. Differentiation and loss of malignant character of spontaneous pulmonary metastases in patient-derived breast cancer models 2014 Cancer Research 74(24) 7406-7417                                                                                         |
|                                            | Bracker, T. U., et al. Efficacy of MS-275, a selective inhibitor of class I histone deacetylases, in human colon cancer models 2009 International Journal of Oncology 35(4) 909-920                                                                                            |
|                                            | Brait, M., et al. Comparative mutational landscape analysis of patient-derived tumour xenografts 2017 British Journal of Cancer 116(4) 515-523                                                                                                                                 |

|                                                                                                                                                                                                                                                                                                         |
|---------------------------------------------------------------------------------------------------------------------------------------------------------------------------------------------------------------------------------------------------------------------------------------------------------|
| Camarda, R., et al. Inhibition of fatty acid oxidation as a therapy for MYC-overexpressing triple-negative breast cancer 2016 <i>Nature Medicine</i> 22(4) 427-432                                                                                                                                      |
| Chartier, C., et al. Therapeutic targeting of tumor-derived r-spondin attenuates b-catenin signaling and tumorigenesis in multiple cancer types 2016 <i>Cancer Research</i> 76(3) 713-723                                                                                                               |
| Clermont, P. L., et al. Identification of the epigenetic reader CBX2 as a potential drug target in advanced prostate cancer 2016 <i>Clinical Epigenetics</i> 8(16) DOI 10.1186/s13148-016-0182-9                                                                                                        |
| Clermont, P. L., et al. Polycomb-mediated silencing in neuroendocrine prostate cancer 2015 <i>Clinical Epigenetics</i> 7(1) 40. doi:10.1186/s13148-015-0074-4.                                                                                                                                          |
| Cottu, P., et al. Acquired resistance to endocrine treatments is associated with tumor-specific molecular changes in patient-derived luminal breast cancer xenografts 2014 <i>Clinical Cancer Research</i> 20(16) 4314-4325                                                                             |
| da Silveira, W. A., et al. Transcription Factor Networks derived from Breast Cancer Stem Cells control the immune response in the Basal subtype 2017 <i>Scientific Reports</i> 7(1) 2851. doi:10.1038/s41598-017-02761-6.                                                                               |
| D'Amato, N. C., et al. Cooperative dynamics of AR and ER activity in breast cancer 2016 <i>Molecular Cancer Research</i> 14(11) 1054-1067                                                                                                                                                               |
| de Cremoux, P., et al. HDAC inhibition does not induce estrogen receptor in human triple-negative breast cancer cell lines and patient-derived xenografts 2015 <i>Breast Cancer Research and Treatment</i> 149(1) 81-89                                                                                 |
| de Morree, E., et al. Understanding taxanes in prostate cancer; importance of intratumoral drug accumulation 2016 <i>Prostate</i> 76(10) 927-936                                                                                                                                                        |
| De Plater, L., et al. Predictive gene signature of response to the anti-TweakR mAb PDL192 in patient-derived breast cancer xenografts 2014 <i>PLoS ONE</i> 9(11) e104227. <a href="https://doi.org/10.1371/journal.pone.0104227">https://doi.org/10.1371/journal.pone.0104227</a>                       |
| Esber, N., et al. Anti-Tumoral Effects of Anti-Progestins in a Patient-Derived Breast Cancer Xenograft Model 2016 <i>Hormones and Cancer</i> 7(2) 137-147                                                                                                                                               |
| Euceda, L. R., et al. Metabolic Response to Everolimus in Patient-Derived Triple-Negative Breast Cancer Xenografts 2017 <i>Journal of Proteome Research</i> 16(5) 1868-1879                                                                                                                             |
| Fichtner, I., et al. The experimental antitumor agents phortress and doxorubicin are equiactive against human-derived breast carcinoma xenograft models 2004 <i>Breast Cancer Research and Treatment</i> 87(1) 97-107                                                                                   |
| Fischer, M., et al. Anti-DLL4 inhibits growth and reduces tumor-initiating cell frequency in colorectal tumors with oncogenic KRAS mutations 2011 <i>Cancer Research</i> 71(5) 1520-1525                                                                                                                |
| Gao, H., et al. High-throughput screening using patient-derived tumor xenografts to predict clinical trial drug response 2015 <i>Nature Medicine</i> 21(11) 1318-1325                                                                                                                                   |
| Garcia-Garcia, C., et al. Dual mTORC1/2 and HER2 blockade results in antitumor activity in preclinical models of breast cancer resistant to anti-HER2 therapy 2012 <i>Clinical Cancer Research</i> 18(9) 2603-2612                                                                                      |
| Garcia-Garcia, C., et al. MEK plus PI3K/mTORC1/2 Therapeutic Efficacy Is Impacted by TP53 Mutation in Preclinical Models of Colorectal Cancer 2015 <i>Clinical Cancer Research</i> 21(24) 5499-5510                                                                                                     |
| Gardner, E. E., et al. Rapamycin rescues ABT-737 efficacy in small cell lung cancer 2014 <i>Cancer Research</i> 74(10) 2846-2856                                                                                                                                                                        |
| Gardner, E. E., et al. Chemosensitive Relapse in Small Cell Lung Cancer Proceeds through an EZH2-SLFN11 Axis 2017 <i>Cancer Cell</i> 31(2) 286-299                                                                                                                                                      |
| Giuliano, M., et al. Circulating and disseminated tumor cells from breast cancer patient-derived xenograft-bearing mice as a novel model to study metastasis 2015 <i>Breast Cancer Research</i> 17(3) <a href="https://doi.org/10.1186/s13058-014-0508-5">https://doi.org/10.1186/s13058-014-0508-5</a> |
| Grinde, M.T., et al. Interplay of choline metabolites and genes in patient-derived breast cancer xenografts 2014 <i>Breast Cancer Research</i> 16(1) R5                                                                                                                                                 |
| Gross, M. I., et al. Antitumor activity of the glutaminase inhibitor CB-839 in triple-negative breast cancer 2014 <i>Molecular Cancer Therapeutics</i> 13(4) 890-901                                                                                                                                    |
| Gurard-Levin, Z. A., et al. Chromatin Regulators as a Guide for Cancer Treatment Choice 2016 <i>Molecular Cancer Therapeutics</i> 15(7) 1768-77                                                                                                                                                         |

|                                                                                                                                                                                                                                                                                                                                            |
|--------------------------------------------------------------------------------------------------------------------------------------------------------------------------------------------------------------------------------------------------------------------------------------------------------------------------------------------|
| Hai, J., et al. Inhibiting MDM2-p53 interaction suppresses tumor growth in patient-derived non-small cell lung cancer xenograft models 2015 Journal of Thoracic Oncology 10(8) 1172-1180                                                                                                                                                   |
| Hammer, S., et al. Comparative profiling of the novel epothilone, sagopilone, in xenografts derived from primary non-small cell lung cancer 2010 Clinical Cancer Research 16(5) 1452-1465                                                                                                                                                  |
| Hatem, R., et al. Targeting mTOR pathway inhibits tumor growth in different molecular subtypes of triple-negative breast cancers 2016 Oncotarget 7(30) 48206-48219                                                                                                                                                                         |
| Hatem, R., et al. Vandetanib as a potential new treatment for estrogen receptor-negative breast cancers 2016 International Journal of Cancer 138(10) 2510-2521                                                                                                                                                                             |
| Haukaas, T. H., et al. Impact of freezing delay time on tissue samples for metabolomic studies 2016 Frontiers in Oncology 6(17)<br>doi:10.3389/fonc.2016.00017.                                                                                                                                                                            |
| Hayes, G. M., et al. Antitumor activity of an anti-CD98 antibody 2015 International Journal of Cancer 137(3) 710-720                                                                                                                                                                                                                       |
| Horiuchi, D., et al. PIM1 kinase inhibition as a targeted therapy against triple-negative breast tumors with elevated MYC expression 2016 Nature Medicine 22(11) 1321-1329                                                                                                                                                                 |
| Hylander, B. L., et al. Tumor priming by Apo2L/TRAIL reduces interstitial fluid pressure and enhances efficacy of liposomal gemcitabine in a patient derived xenograft tumor model 2015 Journal of Controlled Release 217: 160-169                                                                                                         |
| Ibrahim, Y. H., et al. PI3K inhibition impairs BRCA1/2 expression and sensitizes BRCA-proficient triple-negative breast cancer to PARP inhibition 2012 Cancer Discovery 2(11) 1036-1047                                                                                                                                                    |
| Jdey, W., et al. Micronuclei frequency in tumors is a predictive biomarker for genetic instability and sensitivity to the DNA repair inhibitor AsidNA 2017 Cancer Research 77(16) 4207-4216                                                                                                                                                |
| Kavuri, S. M., et al. HER2 activating mutations are targets for colorectal cancer treatment 2015 Cancer Discovery 5(8) 832-841                                                                                                                                                                                                             |
| Kim, E., et al. Anti-angiogenic therapy affects the relationship between tumor vascular structure and function: A correlation study between micro-computed tomography angiography and dynamic contrast enhanced MRI 2016 Magnetic Resonance in Medicine: <a href="https://doi.org/10.1002/mrm.26547">https://doi.org/10.1002/mrm.26547</a> |
| Kim, E. Anti-vascular effects of the cytosolic phospholipase A2 inhibitor AVX235 in a patient-derived basal-like breast cancer model 2016 BMC Cancer 16(191) doi:10.1186/s12885-016-2225-1.                                                                                                                                                |
| Kirouac, D. C., et al. Clinical responses to ERK inhibition in BRAF <sup>V600E</sup> -mutant colorectal cancer predicted using a computational model 2017 Npj Systems Biology & Applications 3: 14                                                                                                                                         |
| Kopf-Maier, P. and Kestenbach, U. Influence of dispase and angiogenesis factors on the growth of human xenografts 1988 Journal of Cancer Research and Clinical Oncology 114(6) 547-552                                                                                                                                                     |
| Kristian, A., et al. Positron emission tomography and pharmacokinetics of 2-[18F]-fluoroethyl choline for metabolic studies in breast cancer xenografts 2014 Acta Oncologica 53(8) 1086-1092                                                                                                                                               |
| Leconet, W., et al. Therapeutic activity of anti-AXL antibody against triple-negative breast cancer patient-derived xenografts and metastasis 2017 Clinical Cancer Research 23(11) 2806-2816                                                                                                                                               |
| Leelatian, N., et al. Single cell analysis of human tissues and solid tumors with mass cytometry 2017 Cytometry Part B - Clinical Cytometry 92(1) 68-78                                                                                                                                                                                    |
| Lefort, S., et al. CXCR4 inhibitors could benefit to HER2 but not to triple-negative breast cancer patients 2017 Oncogene 36(9) 1211-1222                                                                                                                                                                                                  |
| Legrier, M. E., et al. Activation of IFN/STAT1 signalling predicts response to chemotherapy in oestrogen receptor-negative breast cancer 2016 British Journal of Cancer 114(2) 177-187                                                                                                                                                     |
| Leung, K. M., et al. HER2-specific Modified Fc Fragment (Fcab) induces antitumor effects through degradation of HER2 and apoptosis 2015 Molecular Therapy 23(11) 1722-1733                                                                                                                                                                 |

|                                                                                                                                                                                                                                                                                                                                                |
|------------------------------------------------------------------------------------------------------------------------------------------------------------------------------------------------------------------------------------------------------------------------------------------------------------------------------------------------|
| Li, G. G., et al. Antitumor activity of RXDX-105 in multiple cancer types with RET rearrangements or mutations 2017 <i>Clinical Cancer Research</i> 23(12) 2981-2990                                                                                                                                                                           |
| Li, Y., et al. SRRM4 Drives Neuroendocrine Transdifferentiation of Prostate Adenocarcinoma Under Androgen Receptor Pathway Inhibition 2017 <i>European Urology</i> 71(1) 68-78                                                                                                                                                                 |
| Lillo, M. A., et al. Bisphenol A Induces Sox2 in ER <sup>+</sup> Breast Cancer Stem-Like Cells 2017 <i>Hormones and Cancer</i> 8(2) 90-99                                                                                                                                                                                                      |
| Lin, D., et al. Metabolic heterogeneity signature of primary treatment-naive prostate cancer 2017 <i>Oncotarget</i> 8(16) 25928-25941                                                                                                                                                                                                          |
| Lo, J. C. Y., et al. Obesity does not promote tumorigenesis of localized patient-derived prostate cancer xenografts 2016 <i>Oncotarget</i> 7(30) 47650-47662                                                                                                                                                                                   |
| Lok, B. H., et al. PARP Inhibitor activity correlates with slfn11 expression and demonstrates synergy with temozolomide in small cell lung cancer 2017 <i>Clinical Cancer Research</i> 23(2) 523-535                                                                                                                                           |
| M, M. Rabet., et al. Nectin-4: A new prognostic biomarker for efficient therapeutic targeting of primary and metastatic triple-negative breast cancer 2017 <i>Annals of Oncology</i> 28(4) 769-776                                                                                                                                             |
| Maier, A., et al. Anti-tumor activity of the TGF-beta receptor kinase inhibitor galunisertib (LY2157299 monohydrate) in patient-derived tumor xenografts 2015 <i>Cellular Oncology</i> 38(2) 131-144                                                                                                                                           |
| Martin, P., et al. Cetuximab Inhibits T790M-Mediated Resistance to Epidermal Growth Factor Receptor Tyrosine Kinase Inhibitor in a Lung Adenocarcinoma Patient-Derived Xenograft Mouse Model 2016 <i>Clinical Lung Cancer</i> 17(5) 375-383.e2                                                                                                 |
| McGrail, D. J., et al. Improved prediction of PARP inhibitor response and identification of synergizing agents through use of a novel gene expression signature generation algorithm 2017 <i>Npj Systems Biology &amp; Applications</i> 3: 8 <a href="https://doi.org/10.1038/s41540-017-0011-6">https://doi.org/10.1038/s41540-017-0011-6</a> |
| Menghi, F., et al. The tandem duplicator phenotype as a distinct genomic configuration in cancer 2016 <i>Proceedings of the National Academy of Sciences of the United States of America</i> 113(17) E2373-E2382                                                                                                                               |
| Merk, J., et al. Chemoresistance in non-small-cell lung cancer: Can multidrug resistance markers predict the response of xenograft lung cancer models to chemotherapy? 2011 <i>European Journal of Cardio-thoracic Surgery</i> 40(1) e29-e33                                                                                                   |
| Michaelson, J. S., et al. The anti-Fn14 antibody B1B036 inhibits tumor growth in xenografts and patient derived primary tumor models and enhances efficacy of chemotherapeutic agents in multiple xenograft models 2012 <i>Cancer Biology and Therapy</i> 13(9) 812-821                                                                        |
| Min, J. W., et al. Identification of distinct tumor subpopulations in lung adenocarcinoma via single-cell RNA-seq 2015 <i>PLoS ONE</i> 10(8) e0135817. <a href="https://doi.org/10.1371/journal.pone.0135817">https://doi.org/10.1371/journal.pone.0135817</a>                                                                                 |
| Mo, F., et al. Stromal Gene Expression is Predictive for Metastatic Primary Prostate Cancer 2017 <i>European Urology</i> : <a href="https://doi.org/10.1016/j.eururo.2017.02.038">https://doi.org/10.1016/j.eururo.2017.02.038</a>                                                                                                             |
| Nabavi, N., et al. miR-100-5p inhibition induces apoptosis in dormant prostate cancer cells and prevents the emergence of castration-resistant prostate cancer 2017 <i>Scientific Reports</i> 7: 4079 <a href="https://dx.doi.org/10.1038/s41598-017-03731-8">https://dx.doi.org/10.1038/s41598-017-03731-8</a>                                |
| Nakamura, H., et al. Genistein increases epidermal growth factor receptor signaling and promotes tumor progression in advanced human prostate cancer 2011 <i>PLoS ONE</i> 6(5) e20034. <a href="https://doi.org/10.1371/journal.pone.0020034">https://doi.org/10.1371/journal.pone.0020034</a>                                                 |
| Nakamura, H., et al. Genistein versus ICI 182, 780: An ally or enemy in metastatic progression of prostate cancer 2013 <i>Prostate</i> 73(16) 1747-1760                                                                                                                                                                                        |
| Neijzen, R., et al. Irinophore CTM, a lipid nanoparticulate formulation of irinotecan, improves vascular function, increases the delivery of sequentially administered 5-FU in HT-29 tumors, and controls tumor growth in patient derived xenografts of colon cancer 2015 <i>Journal of Controlled Release</i> 199: 72-83                      |
| Niazi, F., et al. AMT: Preclinical pharmacology studies 2009 <i>International Journal of Oncology</i> 34(5) 1341-1352                                                                                                                                                                                                                          |
| Ntai, I., et al. Integrated bottom-up and top-down proteomics of patient-derived breast tumor xenografts 2016 <i>Molecular and Cellular Proteomics</i> 15(1) 45-56                                                                                                                                                                             |

|                                                                                                                                                                                                                                                                                                                   |
|-------------------------------------------------------------------------------------------------------------------------------------------------------------------------------------------------------------------------------------------------------------------------------------------------------------------|
| Nunes, M., et al. Evaluating patient-derived colorectal cancer xenografts as preclinical models by comparison with patient clinical data 2015 <i>Cancer Research</i> 75(8) 1560-1566                                                                                                                              |
| Nyquist, M. D., et al. Exploiting AR-regulated drug transport to induce sensitivity to the survivin inhibitor YM155 2017 <i>Molecular Cancer Research</i> 15(5) 521-531                                                                                                                                           |
| Ogitani, Y., et al. DS-8201a, a novel HER2-targeting ADC with a novel DNA topoisomerase I inhibitor, demonstrates a promising antitumor efficacy with differentiation from T-DM1 2016 <i>Clinical Cancer Research</i> 22(20) 5097-5108                                                                            |
| Omarjee, S., et al. The molecular mechanisms underlying the ERalpha-36-mediated signaling in breast cancer 2017 <i>Oncogene</i> 36(18) 2503-2514                                                                                                                                                                  |
| Paez-Ribes, M., et al. Development of patient derived xenograft models of overt spontaneous breast cancer metastasis: A cautionary note 2016 <i>PLoS ONE</i> 11(6) e0158034. <a href="https://doi.org/10.1371/journal.pone.0158034">https://doi.org/10.1371/journal.pone.0158034</a>                              |
| Paez-Ribes, M., et al. Potential proinvasive or metastatic effects of preclinical antiangiogenic therapy are prevented by concurrent chemotherapy 2015 <i>Clinical Cancer Research</i> 21(24) 5488-5498                                                                                                           |
| Park, J. H., et al. Fatty Acid Oxidation-Driven Src Links Mitochondrial Energy Reprogramming and Oncogenic Properties in Triple-Negative Breast Cancer 2016 <i>Cell Reports</i> 14(9) 2154-2165                                                                                                                   |
| Parolia, A., et al. The long non-coding RNA PCGEM1 is regulated by androgen receptor activity in vivo 2015 <i>Molecular Cancer</i> 14(46) <a href="https://doi.org/10.1186/s12943-015-0314-4">https://doi.org/10.1186/s12943-015-0314-4</a>                                                                       |
| Parra-Palau, J. L., et al. Effect of p95HER2/611CTF on the response to trastuzumab and chemotherapy 2014 <i>Journal of the National Cancer Institute</i> 106(11) <a href="https://doi.org/10.1093/jnci/dju291">https://doi.org/10.1093/jnci/dju291</a>                                                            |
| Paul, P. J., et al. Restoration of tumor suppression in prostate cancer by targeting the E3 ligase E6AP 2016 <i>Oncogene</i> 35(48) 6235-6245                                                                                                                                                                     |
| Pinthus, J. H., et al. Immuno-gene therapy of established prostate tumors using chimeric receptor-redirected human lymphocytes 2003 <i>Cancer Research</i> 63(10) 2470-2476                                                                                                                                       |
| Poirier, J. T., et al. DNA methylation in small cell lung cancer defines distinct disease subtypes and correlates with high expression of EZH2 2015 <i>Oncogene</i> 34(48) 5869-5878                                                                                                                              |
| Qin, X., et al. Gankyrin activates mTORC1 signaling by accelerating TSC2 degradation in colorectal cancer 2016 <i>Cancer Letters</i> 376(1) 83-94                                                                                                                                                                 |
| Qu, S., et al. Enhanced anticancer activity of a combination of docetaxel and Aneustat (OMN54) in a patient-derived, advanced prostate cancer tissue xenograft model 2014 <i>Molecular Oncology</i> 8(2) 311-322                                                                                                  |
| Rajput, S., et al. Inhibition of cyclin dependent kinase 9 by dinaciclib suppresses cyclin B1 expression and tumor growth in triple negative breast cancer 2016 <i>Oncotarget</i> 7(35) 56864-56875                                                                                                               |
| Ribas, R., et al. AKT antagonist AZD5363 influences estrogen receptor function in endocrine-resistant breast cancer and synergizes with fulvestrant (ICI182780) in vivo 2015 <i>Molecular Cancer Therapeutics</i> 14(9) 2035-2048                                                                                 |
| Rolff, J., et al. Response of patient-derived non-small cell lung cancer xenografts to classical and targeted therapies is not related to multidrug resistance markers 2009 <i>Journal of Oncology</i> : <a href="https://doi.org/10.1155/2009/814140">https://doi.org/10.1155/2009/814140</a>                    |
| Rosenberg, L. H., et al. Therapeutic targeting of casein kinase 1delta in breast cancer 2015 <i>Science Translational Medicine</i> 7(318) 318ra202. doi:10.1126/scitranslmed.aac8773.                                                                                                                             |
| Ross, S. J., et al. Targeting KRAS-dependent tumors with AZD4785, a high-affinity therapeutic antisense oligonucleotide inhibitor of KRAS 2017 <i>Science Translational Medicine</i> 9(394) eaal5253 DOI: 10.1126/scitranslmed.aal5253                                                                            |
| Schneeberger, V. E., et al. Quantitation of murine stroma and selective purification of the human tumor component of patient-derived xenografts for genomic analysis 2016 <i>PLoS ONE</i> 11(9) e0160587. <a href="https://doi.org/10.1371/journal.pone.0160587">https://doi.org/10.1371/journal.pone.0160587</a> |
| Serra, V., et al. RSK3/4 mediate resistance to PI3K pathway inhibitors in breast cancer 2013 <i>Journal of Clinical Investigation</i> 123(6) 2551-2563                                                                                                                                                            |
| Shao, C., et al. Inhibition of polo-like kinase 1 (Plk1) enhances the antineoplastic activity of metformin in prostate cancer 2015 <i>Journal of Biological Chemistry</i> 290(4) 2024-2033                                                                                                                        |

|                                                                                                                                                                                                                                                                                                                                     |
|-------------------------------------------------------------------------------------------------------------------------------------------------------------------------------------------------------------------------------------------------------------------------------------------------------------------------------------|
| Shenouda, M. M., et al. Ex vivo expanded natural killer cells from breast cancer patients and healthy donors are highly cytotoxic against breast cancer cell lines and patient-derived tumours 2017 Breast Cancer Research 19(76) <a href="https://doi.org/10.1186/s13058-017-0867-9">https://doi.org/10.1186/s13058-017-0867-9</a> |
| Simoes, B. M., et al. Anti-estrogen Resistance in Human Breast Tumors Is Driven by JAG1-NOTCH4-Dependent Cancer Stem Cell Activity 2015 Cell Reports 12(12) 1968-1977                                                                                                                                                               |
| Skrbo, N., et al. Differential in vivo tumorigenicity of distinct subpopulations from a luminal-like breast cancer xenograft 2014 PLoS ONE 9(11) e113278. <a href="https://doi.org/10.1371/journal.pone.0113278">https://doi.org/10.1371/journal.pone.0113278</a>                                                                   |
| Smith, M. A., et al. Annotation of human cancers with EGFR signaling-associated protein complexes using proximity ligation assays 2015 Science Signaling 8(359) ra4. doi:10.1126/scisignal.2005906.                                                                                                                                 |
| Sommer, A., et al. Preclinical efficacy of the auristatin-based antibody-drug conjugate BAY 1187982 for the treatment of FGFR2-positive solid tumors 2016 Cancer Research 76(21) 6331-6339                                                                                                                                          |
| Song, E. K., et al. Potent antitumor activity of cabozantinib, a c-MET and VEGFR2 inhibitor, in a colorectal cancer patient-derived tumor explant model 2015 International Journal of Cancer 136(8) 1967-1975                                                                                                                       |
| Song, W., et al. Targeting EphA2 impairs cell cycle progression and growth of basal-like/triple-negative breast cancers 2017 Oncogene 36: 5620–5630                                                                                                                                                                                 |
| Stewart, C. A., et al. Dynamic variations in epithelial-to-mesenchymal transition (EMT), ATM, and SLFN11 govern response to PARP inhibitors and cisplatin in small cell lung cancer 2017 Oncotarget 8(17) 28575-28587                                                                                                               |
| Stimmer, L., et al. Human breast cancer and lymph node metastases express Gb3 and can be targeted by STxB-vectorized chemotherapeutic compounds 2014 BMC Cancer 14(916) <a href="https://doi.org/10.1186/1471-2407-14-916">https://doi.org/10.1186/1471-2407-14-916</a>                                                             |
| Strop, P., et al. RN927C, a site-specific trop-2 antibody-drug conjugate (ADC) with enhanced stability, is highly efficacious in preclinical solid tumor models 2016 Molecular Cancer Therapeutics 15(11) 2698-2708                                                                                                                 |
| Takai, K., et al. Targeting the cancer-associated fibroblasts as a treatment in triple-negative breast cancer 2016 Oncotarget 7(50) 82889-82901                                                                                                                                                                                     |
| Tan, W. L., et al. Low cytosine triphosphate synthase 2 expression renders resistance to 5-fluorouracil in colorectal cancer 2011 Cancer Biology and Therapy 11(6) 599-608                                                                                                                                                          |
| Tentler, J. J., et al. Assessment of the in vivo antitumor effects of ENMD-2076, a novel multitargeted kinase inhibitor, against primary and cell line-derived human colorectal cancer xenograft models 2010 Clinical Cancer Research 16(11) 2989-2998                                                                              |
| Ter Brugge, P., et al. Mechanisms of therapy resistance in patient-derived xenograft models of brca1-deficient breast cancer 2016 Journal of the National Cancer Institute 108(11) <a href="https://doi.org/10.1093/jnci/djw148">https://doi.org/10.1093/jnci/djw148</a>                                                            |
| Thomas, S. N., et al. Application of quantitative proteomics to the integrated analysis of the ubiquitylated and global proteomes of xenograft tumor tissues 2015 Clinical Proteomics 12(14) <a href="https://doi.org/10.1186/s12014-015-9086-5">https://doi.org/10.1186/s12014-015-9086-5</a>                                      |
| Tian, L., et al. Mutual regulation of tumour vessel normalization and immunostimulatory reprogramming 2017 Nature 544: 250–254                                                                                                                                                                                                      |
| Tripathi, S. C., et al. MCAM mediates chemoresistance in small cell lung cancer via the PI3K/AKT/SOX2 signaling pathway 2017 Cancer Research 77(16) 4414-4425                                                                                                                                                                       |
| Tury, S., et al. Combination of COX-2 expression and PIK3CA mutation as prognostic and predictive markers for celecoxib treatment in breast cancer 2016 Oncotarget 7(51) 85124-85141                                                                                                                                                |
| Ue Luk, I. S., et al. BIRC6 targeting as potential therapy for advanced, enzalutamide-resistant prostate cancer 2017 Clinical Cancer Research 23(6) 1542-1551                                                                                                                                                                       |
| Valtorta, S., et al. Metabolic evaluation of non-small cell lung cancer patient-derived xenograft models using <sup>18</sup> F-FDG PET: A potential tool for early therapy response 2017 Journal of Nuclear Medicine 58(1) 42-47                                                                                                    |
| van der Lee, M. M., et al. The Preclinical Profile of the Duocarmycin-Based HER2-Targeting ADC SYD985 Predicts for Clinical Benefit in Low HER2-Expressing Breast Cancers 2015 Molecular Cancer Therapeutics 14(3) 692-703                                                                                                          |

|                                                                                                                                                                                                                                                                                                          |
|----------------------------------------------------------------------------------------------------------------------------------------------------------------------------------------------------------------------------------------------------------------------------------------------------------|
| Varkaris, A., et al. Integrating murine and clinical trials with cabozantinib to understand roles of MET and VEGFR2 as targets for growth inhibition of prostate cancer 2016 Clinical Cancer Research 22(1) 107-121                                                                                      |
| Vendetti, F. P., et al. Evaluation of azacitidine and entinostat as sensitization agents to cytotoxic chemotherapy in preclinical models of non-small cell lung cancer 2015 Oncotarget 6(1) 56-70                                                                                                        |
| Vijayaraghavan, S., et al. CDK4/6 and autophagy inhibitors synergistically induce senescence in Rb positive cytoplasmic cyclin e negative cancers 2017 Nature Communications 8: 15916. doi:10.1038/ncomms15916.                                                                                          |
| Wallin, J. J., et al. GDC-0941, a novel class I selective PI3K inhibitor, enhances the efficacy of docetaxel in human breast cancer models by increasing cell death In Vitro and In Vivo 2012 Clinical Cancer Research 18(14) 3901-3911                                                                  |
| Wang, D., et al. LncRNA MALAT1 enhances oncogenic activities of EZH2 in castration-resistant prostate cancer 2015 Oncotarget 6(38) 41045-41055                                                                                                                                                           |
| Wardell, S. E., et al. Efficacy of SERD/SERM Hybrid-CDK4/6 Inhibitor Combinations in Models of Endocrine Therapy-Resistant Breast Cancer 2015 Clinical Cancer Research 21(22) 5121-5130                                                                                                                  |
| Weiswald, L. B., et al. A short-term colorectal cancer sphere culture as a relevant tool for human cancer biology investigation 2013 British Journal of Cancer 108(8) 1720-31                                                                                                                            |
| Welte, T., et al. Oncogenic mTOR signalling recruits myeloid-derived suppressor cells to promote tumour initiation 2016 Nature Cell Biology 18(6) 632-644                                                                                                                                                |
| Wu, W., et al. Inhibition of tumor growth and metastasis in non-small cell lung cancer by LY2801653, an inhibitor of several oncokinases, including MET 2013 Clinical Cancer Research 19(20) 5699-5710                                                                                                   |
| Xie, B. Y. and Wu, A. W. Organoid culture of isolated cells from patient-derived tissues with colorectal cancer 2016 Chinese Medical Journal 129(20) 2469-2475                                                                                                                                           |
| Xu, S., et al. Combined targeting of mTOR and AKT Is an effective strategy for basal-like breast cancer in patient-derived xenograft models 2013 Molecular Cancer Therapeutics 12(8) 1665-1675                                                                                                           |
| Yamamoto, Y., et al. Generation 2.5 antisense oligonucleotides targeting the androgen receptor and its splice variants suppress enzalutamide-resistant prostate cancer cell growth 2015 Clinical Cancer Research 21(7) 1675-1687                                                                         |
| Zacarias-Fluck, M. F., et al. Effect of cellular senescence on the growth of HER2-positive breast cancers 2015 Journal of the National Cancer Institute 107(5) djv020, <a href="https://doi.org/10.1093/jnci/djv020">https://doi.org/10.1093/jnci/djv020</a>                                             |
| Zhang, H., et al. Tumor-selective proteotoxicity of verteporfin inhibits colon cancer progression independently of YAP1 2015 Science Signaling 8(397) ra98                                                                                                                                               |
| Zhang, X., et al. Breast Cancer Neoantigens Can Induce CD8 <sup>+</sup> T-Cell Responses and Antitumor Immunity 2017 Cancer Immunology Research 5(7) 516-523                                                                                                                                             |
| Zhang, Z., et al. Plk1 inhibition enhances the efficacy of androgen signaling blockade in castration-resistant prostate cancer 2014 Cancer Research 74(22) 6635-6647                                                                                                                                     |
| Zheng, J., et al. Differential expression of the 18 kDa translocator protein (TSPO) by neoplastic and inflammatory cells in mouse tumors of breast cancer 2011 Molecular Pharmaceutics 8(3) 823-832                                                                                                      |
| Zhu, X., et al. Epithelial derived CTGF promotes breast tumor progression via inducing EMT and collagen I fibers deposition 2015 Oncotarget 6(28) 25320-25338                                                                                                                                            |
| Zinn, R. L., et al. Combination treatment with ABT-737 and chloroquine in preclinical models of small cell lung cancer 2013 Molecular Cancer 12(1) no pagination                                                                                                                                         |
| Asundi, J., et al. An Antibody-Drug Conjugate Directed against Lymphocyte Antigen 6 Complex, Locus E (LY6E) Provides Robust Tumor Killing in a Wide Range of Solid Tumor Malignancies. 2015 Clinical cancer research: an official journal of the American Association for Cancer Research 21(14) 3252-62 |
| Breij, E.C.W., et al. An antibody-drug conjugate that targets tissue factor exhibits potent therapeutic activity against a broad range of solid tumors. 2014 Cancer research 74(4) 1214-26                                                                                                               |

|                  |                                                                                                                                                                                                                                                                                                                                                                                                                                                                                                                                                                                                                                                                                                                                                                                                                                                                                                                                                                                                                                                                                                                                                                                                                                                                                                                                                                                                                                                                                                                                                                                                                                                                                                                                                                                                                                                                                                                                                                                                          |                                                                                                                                                                                                                                                                                                                                                                                                                                                                                                                                                                                                                                                                                                                                                                                                                                                                                                                                                                                                                                                                                                                                                                                                                                                                                                                                                                                                                                                                                                                                                                                                                      |
|------------------|----------------------------------------------------------------------------------------------------------------------------------------------------------------------------------------------------------------------------------------------------------------------------------------------------------------------------------------------------------------------------------------------------------------------------------------------------------------------------------------------------------------------------------------------------------------------------------------------------------------------------------------------------------------------------------------------------------------------------------------------------------------------------------------------------------------------------------------------------------------------------------------------------------------------------------------------------------------------------------------------------------------------------------------------------------------------------------------------------------------------------------------------------------------------------------------------------------------------------------------------------------------------------------------------------------------------------------------------------------------------------------------------------------------------------------------------------------------------------------------------------------------------------------------------------------------------------------------------------------------------------------------------------------------------------------------------------------------------------------------------------------------------------------------------------------------------------------------------------------------------------------------------------------------------------------------------------------------------------------------------------------|----------------------------------------------------------------------------------------------------------------------------------------------------------------------------------------------------------------------------------------------------------------------------------------------------------------------------------------------------------------------------------------------------------------------------------------------------------------------------------------------------------------------------------------------------------------------------------------------------------------------------------------------------------------------------------------------------------------------------------------------------------------------------------------------------------------------------------------------------------------------------------------------------------------------------------------------------------------------------------------------------------------------------------------------------------------------------------------------------------------------------------------------------------------------------------------------------------------------------------------------------------------------------------------------------------------------------------------------------------------------------------------------------------------------------------------------------------------------------------------------------------------------------------------------------------------------------------------------------------------------|
|                  | <p>Kolev, V. N., et al. PI3K/mTOR dual inhibitor VS-5584 preferentially targets cancer stem cells. 2015 Cancer research 75(2) 446-55</p> <p>Snowden, E., et al. Immunophenotyping and Transcriptomic Outcomes in PDX-Derived TNBC Tissue. 2017 Molecular cancer research: MCR 15(4) 429-438</p> <p>Sommer, A., et al. Preclinical Efficacy of the Auristatin-Based Antibody-Drug Conjugate BAY 1187982 for the Treatment of FGFR2-Positive Solid Tumors. 2016 Cancer research 76(21) 6331-6339</p> <p>Strop, P., et al. RN927C, a Site-Specific Trop-2 Antibody-Drug Conjugate (ADC) with Enhanced Stability, Is Highly Efficacious in Preclinical Solid Tumor Models. 2016 Molecular cancer therapeutics 15(11) 2698-2708</p>                                                                                                                                                                                                                                                                                                                                                                                                                                                                                                                                                                                                                                                                                                                                                                                                                                                                                                                                                                                                                                                                                                                                                                                                                                                                           |                                                                                                                                                                                                                                                                                                                                                                                                                                                                                                                                                                                                                                                                                                                                                                                                                                                                                                                                                                                                                                                                                                                                                                                                                                                                                                                                                                                                                                                                                                                                                                                                                      |
| Exclude [review] | <p>Brown, K. M., et al. Patient-derived xenograft models of colorectal cancer in preclinical research: A systematic review 2016 Oncotarget 7(40) 66212-66225</p> <p>Bruna, A., et al. Modeling breast cancer intertumor and intratumor heterogeneity using xenografts 2016 Cold Spring Harbor Symposia on Quantitative Biology 81(1) 227-230</p> <p>Gandara, D. R., et al. Patient-derived xenografts for investigation of acquired resistance in oncogene-driven cancers: Building a better mousetrap 2015 Journal of Clinical Oncology 33(26) 2839-2840</p> <p>Grossenbacher, S. K., et al. Natural killer cell immunotherapy to target stem-like tumor cells 2016 Journal for ImmunoTherapy of Cancer 4(19) <a href="https://doi.org/10.1186/s40425-016-0124-2">https://doi.org/10.1186/s40425-016-0124-2</a></p> <p>Jin, K., et al. Patient-derived human tumour tissue xenografts in immunodeficient mice: A systematic review 2010 Clinical and Translational Oncology 12(7) 473-480</p> <p>Kitai, H. and Ebi, H. Key roles of EMT for adaptive resistance to MEK inhibitor in KRAS mutant lung cancer 2016 Small GTPases 8(3) 172-176</p> <p>Koh, T. S., et al. Assessment of tumor necrotic fraction by dynamic contrast-enhanced MRI: A preclinical study of human tumor xenografts with histopathologic correlation 2014 NMR in Biomedicine 27(4) 486-494</p> <p>Merk, J., et al. Patient-derived xenografts of non-small-cell lung cancer: a pre-clinical model to evaluate adjuvant chemotherapy? 2009 European Journal of Cardio-thoracic Surgery 36(3) 454-459</p> <p>Brogna, E. "The development tumor model" to study and monitor the entire progression of both primary and metastatic tumors. 2014 Tumour biology: the journal of the International Society for Oncodevelopmental Biology and Medicine 35(3) 2219-30</p> <p>Hoffman, R. M. Patient-derived orthotopic xenografts: better mimic of metastasis than subcutaneous xenografts. 2015 Nature reviews. Cancer 15(8) 451-2</p> |                                                                                                                                                                                                                                                                                                                                                                                                                                                                                                                                                                                                                                                                                                                                                                                                                                                                                                                                                                                                                                                                                                                                                                                                                                                                                                                                                                                                                                                                                                                                                                                                                      |
|                  | Exclude [wrong tissue]                                                                                                                                                                                                                                                                                                                                                                                                                                                                                                                                                                                                                                                                                                                                                                                                                                                                                                                                                                                                                                                                                                                                                                                                                                                                                                                                                                                                                                                                                                                                                                                                                                                                                                                                                                                                                                                                                                                                                                                   | <p>Ab, O., et al. IMGN853, a folate receptor-alpha (FRalpha)-targeting antibody-drug conjugate, exhibits potent targeted antitumor activity against FRalpha-expressing tumors 2015 Molecular Cancer Therapeutics 14(7) 1605-1613</p> <p>Astudillo, L., et al. The small molecule IMR-1 inhibits the notch transcriptional activation complex to suppress tumorigenesis 2016 Cancer Research 76(12) 3593-3603</p> <p>Bardelli, A., et al. Amplification of the MET receptor drives resistance to anti-EGFR therapies in colorectal cancer 2013 Cancer Discovery 3(6) 658-673</p> <p>Bofill-De Ros, X., et al. Late-phase miRNA-controlled oncolytic adenovirus for selective killing of cancer cells 2015 Oncotarget 6(8) 6179-6190</p> <p>Bousquet, G., et al. Targeting autophagic cancer stem-cells to reverse chemoresistance in human triple negative breast cancer 2017 Oncotarget 8(21) 35205-35221</p> <p>Brand T.M., et al. AXL mediates resistance to cetuximab therapy 2014 Cancer research 74(18) 5152-5164</p> <p>Chdiwa, T., et al. Establishment of patient-derived cancer xenografts in immunodeficient NOG mice 2015 International Journal of Oncology 47(1) 61-70</p> <p>Cho, Y. B., et al. Colorectal cancer patient-derived xenografted tumors maintain characteristic features of the original tumors 2014 Journal of Surgical Research 187(2) 502-509</p> <p>Collins, C. C., et al. Next generation sequencing of prostate cancer from a patient identifies a deficiency of methylthioadenosine phosphorylase, an exploitable tumor target 2012 Molecular Cancer Therapeutics 11(3) 775-781</p> |

|                                                                                                                                                                                                                                                                           |
|---------------------------------------------------------------------------------------------------------------------------------------------------------------------------------------------------------------------------------------------------------------------------|
| Dela Cruz, F. S., et al. A case study of an integrative genomic and experimental therapeutic approach for rare tumors: Identification of vulnerabilities in a pediatric poorly differentiated carcinoma 2016 <i>Genome Medicine</i> 8(116) doi:10.1186/s13073-016-0366-0. |
| Ducker, G. S., et al. Incomplete inhibition of phosphorylation of 4E-BP1 as a mechanism of primary resistance to ATP-competitive mTOR inhibitors 2014 <i>Oncogene</i> 33(12) 1590-1600                                                                                    |
| Fischer, M. M., et al. WNT antagonists exhibit unique combinatorial antitumor activity with taxanes by potentiating mitotic cell death 2017 <i>Science Advances</i> 3(6) e1700090                                                                                         |
| Fleming, J. M., et al. Local regulation of human breast xenograft models 2010 <i>Journal of Cellular Physiology</i> 224(3) 795-806                                                                                                                                        |
| Fong, E. L. S., et al. Hydrogel-based 3D model of patient-derived prostate xenograft tumors suitable for drug screening 2014 <i>Molecular Pharmaceutics</i> 11(7) 2040-2050                                                                                               |
| Fong, E. L. S., et al. 3D in vitro model of patient-derived prostate cancer xenograft for controlled interrogation of in vivo tumor-stromal interactions 2016 <i>Biomaterials</i> 77: 164-172                                                                             |
| Gad, H., et al. MTH1 inhibition eradicates cancer by preventing sanitation of the dNTP pool 2014 <i>Nature</i> 508(7495) 215-221                                                                                                                                          |
| Gan, G. N., et al., A. Radiation dose uncertainty and correction for a mouse orthotopic and xenograft irradiation model 2016 <i>International Journal of Radiation Biology</i> 92(1) 50-56                                                                                |
| Garcia-Heredia, J. M., et al. The Cargo Protein MAP17 (PDZK1IP1) Regulates the Cancer Stem Cell Pool Activating the Notch Pathway by Abducting NUMB 2017 <i>Clinical Cancer Research</i> : DOI: 10.1158/1078-0432.CCR-16-2358                                             |
| Goel, S., et al. Overcoming Therapeutic Resistance in HER2-Positive Breast Cancers with CDK4/6 Inhibitors 2016 <i>Cancer Cell</i> 29(3) 255-269                                                                                                                           |
| Goldstein, J. B., et al. Can Microsatellite Status of Colorectal Cancer Be Reliably Assessed after Neoadjuvant Therapy? 2017 <i>Clinical Cancer Research</i> 23(17) 5246-54                                                                                               |
| Golfier, S., et al. Anetumab ravtansine: A novel mesothelin-targeting antibody-drug conjugate cures tumors with heterogeneous target expression favored by bystander effect 2014 <i>Molecular Cancer Therapeutics</i> 13(6) 1537-1548                                     |
| Goncalves, A., et al. Targeted NGS, array-CGH, and patient-derived tumor xenografts for precision medicine in advanced breast cancer: A single-center prospective study 2016 <i>Oncotarget</i> 7(48) 79428-79441                                                          |
| Guan, Z., et al. Synergistic effects and mechanism of Danshen injection in combination with chemotherapy and antiangiogenic therapy for colon cancer 2017 <i>International Journal of Clinical and Experimental Medicine</i> 10(4) 6437-6444                              |
| Gujral, T. S. and Kirschner, M. W. Hippo pathway mediates resistance to cytotoxic drugs 2017 <i>Proceedings of the National Academy of Sciences of the United States of America</i> 114(18) E3729-E3738                                                                   |
| Harrison, H., et al. Contrasting hypoxic effects on breast cancer stem cell hierarchy is dependent on er-a status 2013 <i>Cancer Research</i> 73(4) 1420-1433                                                                                                             |
| Kim, M. K., et al. Characterization of an oxaliplatin sensitivity predictor in a preclinical murine model of colorectal cancer 2012 <i>Molecular Cancer Therapeutics</i> 11(7) 1500-1509                                                                                  |
| Kleb, B., et al. Differentially methylated genes and androgen receptor re-expression in small cell prostate carcinomas 2016 <i>Epigenetics</i> 11(3) 184-193                                                                                                              |
| Ladd, B., et al. Effective combination therapies in preclinical endocrine resistant breast cancer models harboring ER mutations 2016 <i>Oncotarget</i> 7(34) 54120-54136                                                                                                  |
| LeBeau, A. M., et al. Imaging a functional tumorigenic biomarker in the transformed epithelium 2013 <i>Proceedings of the National Academy of Sciences of the United States of America</i> 110(1) 93-98                                                                   |
| Lillo, M. A., et al. Methylparaben stimulates tumor initiating cells in ER+ breast cancer models 2017 <i>Journal of Applied Toxicology</i> 37(4) 417-425                                                                                                                  |
| Lin, D., et al. Identification of DEK as a potential therapeutic target for neuroendocrine prostate cancer 2015 <i>Oncotarget</i> 6(3) 1806-1820                                                                                                                          |
| Madan, B., et al. Wnt addiction of genetically defined cancers reversed by PORCN inhibition 2016 <i>Oncogene</i> 35(17) 2197-2207                                                                                                                                         |
| Nakajima, T., et al. Patient-derived tumor xenograft models established from samples obtained by endobronchial ultrasound-guided transbronchial needle aspiration 2015 <i>Lung Cancer</i> 89(2) 110-114                                                                   |

|                                                                                                                                                                                                                                                                                                                                           |
|-------------------------------------------------------------------------------------------------------------------------------------------------------------------------------------------------------------------------------------------------------------------------------------------------------------------------------------------|
| Nguyen, A., et al. PKLR promotes colorectal cancer liver colonization through induction of glutathione synthesis 2016 <i>Journal of Clinical Investigation</i> 126(2) 681-694                                                                                                                                                             |
| Ni, J., et al. Combination inhibition of PI3K and mTORC1 yields durable remissions in mice bearing orthotopic patient-derived xenografts of HER2-positive breast cancer brain metastases 2016 <i>Nature Medicine</i> 22(7) 723-726                                                                                                        |
| O'Brien, T., et al. Supplementation of nicotinic acid with NAMPT inhibitors results in loss of in vivo efficacy in NAPRT1-deficient tumor models 2013 <i>Neoplasia (United States)</i> 15(12) 1314-1329                                                                                                                                   |
| Owonikoko, T. K., et al. Patient-derived xenografts faithfully replicated clinical outcome in a phase II co-clinical trial of arsenic trioxide in relapsed small cell lung cancer 2016 <i>Journal of Translational Medicine</i> 14(111) <a href="https://doi.org/10.1186/s12967-016-0861-5">https://doi.org/10.1186/s12967-016-0861-5</a> |
| Pahle, J., et al. Rapid eradication of colon carcinoma by <i>Clostridium perfringens</i> Enterotoxin suicidal gene therapy 2017 <i>BMC Cancer</i> 17(129) <a href="https://doi.org/10.1186/s12885-017-3123-x">https://doi.org/10.1186/s12885-017-3123-x</a>                                                                               |
| Pan, W., et al. Heterogeneity-related anticancer therapy response differences in metastatic colon carcinoma: New hints to tumor-site-based personalized cancer therapy 2013 <i>Hepato-Gastroenterology</i> 60(128) 1927-1934                                                                                                              |
| Patsialou, A., et al. Intravital multiphoton imaging reveals multicellular streaming as a crucial component of in vivo cell migration in human breast tumors 2013 <i>IntraVital</i> 2(2) e25294, DOI: 10.4161/intv.25294                                                                                                                  |
| Perez, M., et al. Dasatinib, a Src inhibitor, sensitizes liver metastatic colorectal carcinoma to oxaliplatin in tumors with high levels of phospho-Src 2016 <i>Oncotarget</i> 7(22) 33111-33124                                                                                                                                          |
| Picco, G., et al. Efficacy of NEDD8 pathway inhibition in preclinical models of poorly differentiated, clinically aggressive colorectal cancer 2017 <i>Journal of the National Cancer Institute</i> 109(2) <a href="https://doi.org/10.1093/jnci/djw209">https://doi.org/10.1093/jnci/djw209</a>                                          |
| Porru, M., et al. Targeting G-quadruplex DNA structures by EMICORON has a strong antitumor efficacy against advanced models of human colon cancer 2015 <i>Molecular Cancer Therapeutics</i> 14(11) 2541-2551                                                                                                                              |
| Potter, D. S., et al. Inhibition of PI3K/BMX cell survival pathway sensitizes to BH3 mimetics in SCLC 2016 <i>Molecular Cancer Therapeutics</i> 15(6) 1248-1260                                                                                                                                                                           |
| Proia, D. A., et al. HSP90 inhibitor-SN-38 conjugate strategy for targeted delivery of topoisomerase i inhibitor to tumors 2015 <i>Molecular Cancer Therapeutics</i> 14(11) 2422-2432                                                                                                                                                     |
| Smoot, R. L., et al. Platelet-Derived Growth Factor Regulates YAP Transcriptional Activity via Src Family Kinase Dependent Tyrosine Phosphorylation 2017 <i>Journal of Cellular Biochemistry</i> 119(1) 10.1002/jcb.26246                                                                                                                 |
| Sun, S., et al. Targeting and regulating of an oncogene via nanovector delivery of MicroRNA using patient-derived tumor xenografts 2017 <i>Theranostics</i> 7(3) 677-693                                                                                                                                                                  |
| Tateishi, K., et al. The alkylating chemotherapeutic temozolomide induces metabolic stress in IDH1-mutant cancers and potentiates NAD <sup>+</sup> depletion-mediated cytotoxicity 2017 <i>Cancer Research</i> 77(15) canres.2263.2016. 10.1158/0008-5472.CAN-16-2263.                                                                    |
| Tsai, H., et al. Cyclin D1 Loss Distinguishes Prostatic Small-Cell Carcinoma from Most Prostatic Adenocarcinomas 2015 <i>Clinical Cancer Research</i> 21(24) 5619-5629                                                                                                                                                                    |
| Tung, W. L., et al. Use of irinotecan for treatment of small cell carcinoma of the prostate 2011 <i>Prostate</i> 71(7) 675-681                                                                                                                                                                                                            |
| Wang, H., et al. The metabolic function of cyclin D3-CDK6 kinase in cancer cell survival 2017 <i>Nature</i> 546(7658) 426-430                                                                                                                                                                                                             |
| Zanella, E. R., et al. IGF2 is an actionable target that identifies a distinct subpopulation of colorectal cancer patients with marginal response to anti-EGFR therapies 2015 <i>Science Translational Medicine</i> 7(272) 272ra12                                                                                                        |
| Abelson, S., et al. Niche-dependent gene expression profile of intratumoral heterogeneous ovarian cancer stem cell populations. 2013 <i>PloS one</i> 8(12) e83651                                                                                                                                                                         |
| Alvero, A. B., et al. Stem-like ovarian cancer cells can serve as tumor vascular progenitors. 2009 <i>Stem cells (Dayton, Ohio)</i> 27(10) 2405-13                                                                                                                                                                                        |
| Antunes, L., et al. Analysis of tissue chimerism in nude mouse brain and abdominal xenograft models of human glioblastoma multiforme: what does it tell us about the models and about glioblastoma biology and therapy? 2000 <i>The journal of histochemistry and cytochemistry</i> : 48(6) 847-58                                        |

|                                                                                                                                                                                                                                       |
|---------------------------------------------------------------------------------------------------------------------------------------------------------------------------------------------------------------------------------------|
| Bankert, R.B., et al. Humanized mouse model of ovarian cancer recapitulates patient solid tumor progression, ascites formation, and metastasis. 2011 PloS one 6(9) e24420                                                             |
| Boult, J.K.R., et al. Preclinical transgenic and patient-derived xenograft models recapitulate the radiological features of human adamantinomatous craniopharyngioma. 2017 Brain pathology (Zurich, Switzerland) 28(4) 475-483        |
| Calabuig-Fariñas, S., et al. Characterization of a new human cell line (CH-3573) derived from a grade II chondrosarcoma with matrix production. 2012 Pathology oncology research: POR 18(4) 793-802                                   |
| Emura, F., et al. Establishment and characterization of novel xenograft models of human biliary tract carcinomas. 2003 International journal of oncology 23(5) 1293-300                                                               |
| Friel, A. M., et al. Epigenetic regulation of CD133 and tumorigenicity of CD133 positive and negative endometrial cancer cells. 2010 Reproductive biology and endocrinology: RB&E 8: 147                                              |
| Garcia, P.L., et al. Development and histopathological characterization of tumorgraft models of pancreatic ductal adenocarcinoma. 2013 PloS one 8(10) e78183                                                                          |
| He, X., et al. Differentiation of a highly tumorigenic basal cell compartment in urothelial carcinoma. 2009 Stem cells (Dayton, Ohio) 27(7) 1487-95                                                                                   |
| Holmberg, J., et al. Activation of neural and pluripotent stem cell signatures correlates with increased malignancy in human glioma. 2011 PloS one 6(3) e18454                                                                        |
| Huynh, H., et al. Sunitinib (SUTENT, SU11248) suppresses tumor growth and induces apoptosis in xenograft models of human hepatocellular carcinoma. 2009 Current cancer drug targets 9(6) 738-47                                       |
| Isobe, N., et al. Experimental studies of the antitumor effect of TNP-470 on malignant brain tumors. Antitumor effect of TNP-470 on a human medulloblastoma xenograft line. 1996 Neuropediatrics 27(3) 136-42                         |
| Jacobsen, Britta M., et al. Spontaneous fusion with, and transformation of mouse stroma by, malignant human breast cancer epithelium. 2006 Cancer research 66(16) 8274-9                                                              |
| Jambal, P., et al. Estrogen switches pure mucinous breast cancer to invasive lobular carcinoma with mucinous features. 2013 Breast cancer research and treatment 137(2) 431-48                                                        |
| Jensen, R L., et al. Matrigel augments xenograft transplantation of meningioma cells into athymic mice. 1998 Neurosurgery 42(1) 130-5; discussion 135-6                                                                               |
| Krasagakis, K., et al. Growth and characterization of a cell line from a human primary neuroendocrine carcinoma of the skin (Merkel cell carcinoma) in culture and as xenograft. 2001 Journal of cellular physiology 187(3) 386-91    |
| Lewko, W M., et al. Cultured cell lines from human breast cancer biopsies and xenografts. 1990 Breast cancer research and treatment 17(2) 121-9                                                                                       |
| Luo, Y., et al. Side population cells from human melanoma tumors reveal diverse mechanisms for chemoresistance. 2012 The Journal of investigative dermatology 132(10) 2440-50                                                         |
| Moserle, L., et al. The side population of ovarian cancer cells is a primary target of IFN-alpha antitumor effects. 2008 Cancer research 68(14) 5658-68                                                                               |
| Nolte, Sara M., et al. A cancer stem cell model for studying brain metastases from primary lung cancer. 2013 Journal of the National Cancer Institute 105(8) 551-62                                                                   |
| Orecchia, P., et al. Targeting Syndecan-1, a molecule implicated in the process of vasculogenic mimicry, enhances the therapeutic efficacy of the L19-IL2 immunocytokine in human melanoma xenografts. 2015 Oncotarget 6(35) 37426-42 |
| Pode-Shakked, N. et al., The isolation and characterization of renal cancer initiating cells from human Wilms' tumour xenografts unveils new therapeutic targets. 2013 EMBO molecular medicine 5(1) 18-37                             |
| Rahimi, G., et al. Re-vascularisation in human ovarian tissue after conventional freezing or vitrification and xenotransplantation. 2010 European journal of obstetrics, gynecology, and reproductive biology 149(1) 63-7             |
| Rath, K.S., et al. HO-3867, a safe STAT3 inhibitor, is selectively cytotoxic to ovarian cancer. 2014 Cancer research 74(8) 2316-27                                                                                                    |
| Rocco, A., et al. CD133 and CD44 cell surface markers do not identify cancer stem cells in primary human gastric tumors. 2012 Journal of cellular physiology 227(6) 2686-93                                                           |

|                                |                                                                                                                                                                                                                                                                                                                            |
|--------------------------------|----------------------------------------------------------------------------------------------------------------------------------------------------------------------------------------------------------------------------------------------------------------------------------------------------------------------------|
|                                | Singh, S.K., et al. Identification of human brain tumour initiating cells. 2004 Nature 432(7015) 396-401                                                                                                                                                                                                                   |
|                                | Steinstraesser, L., et al. Establishment of a primary human sarcoma model in athymic nude mice. 2010 Human cell 23(2) 50-7                                                                                                                                                                                                 |
|                                | Sun, K., et al. Dual HDAC and PI3K Inhibitor CUDC-907 Downregulates MYC and Suppresses Growth of MYC-dependent Cancers. 2017 Molecular cancer therapeutics 16(2) 285-299                                                                                                                                                   |
|                                | Taetle, R., et al. Use of nude mouse xenografts as preclinical screens. Characterization of xenograft-derived melanoma cell lines. 1987 Cancer 60(8) 1836-41                                                                                                                                                               |
|                                | Tilkorn, D., et al. Establishing efficient xenograft models with intrinsic vascularisation for growing primary human low-grade sarcomas. 2011 Anticancer research 31(12) 4061-6                                                                                                                                            |
|                                | Tilkorn, D-J., et al. A novel xenograft model with intrinsic vascularisation for growing undifferentiated pleomorphic sarcoma NOS in mice. 2012 Journal of cancer research and clinical oncology 138(5) 877-84                                                                                                             |
|                                | Ueno, M., et al. Establishment of a testicular carcinoma cell line producing alpha-fetoprotein. 2001 BJU international 88(6) 611-21                                                                                                                                                                                        |
|                                | van Haaften-Day, C., et al. Flow cytometric and morphological studies of ovarian carcinoma cell lines and xenografts. 1983 Cancer research 43(8) 3725-31                                                                                                                                                                   |
|                                | Wagner, W. The heterogeneity of solid human xenotransplant tumours. 1991 Journal of cancer research and clinical oncology 117(6) 568-74                                                                                                                                                                                    |
|                                | Wang, CYY., et al. Hedgehog and Notch signaling regulate self-renewal of undifferentiated pleomorphic sarcomas. 2012 Cancer research 72(4) 1013-22                                                                                                                                                                         |
|                                | Waters, A.M., et al. A Preclinical Evaluation of UAB30 in Pediatric Renal and Hepatic Malignancies. 2016 Molecular cancer therapeutics 15(5) 911-21                                                                                                                                                                        |
|                                | Wu, C-P., et al. Identification of cancer stem-like side population cells in purified primary cultured human laryngeal squamous cell carcinoma epithelia. 2013 PloS one 8(6) e65750                                                                                                                                        |
|                                | Yapp, D.T., et al. The differential effects of metronomic gemcitabine and antiangiogenic treatment in patient-derived xenografts of pancreatic cancer: treatment effects on metabolism, vascular function, cell proliferation, and tumor growth. 2016 Angiogenesis 19(2) 229-44                                            |
|                                | Yi, D., et al. EGFR gene overexpression retained in an invasive xenograft model by solid orthotopic transplantation of human glioblastoma multiforme into nude mice. 2011 Cancer investigation 29(3) 229-39                                                                                                                |
|                                | Zamboni, W C., et al. Relationship between topotecan systemic exposure and tumor response in human neuroblastoma xenografts. 1998 Journal of the National Cancer Institute 90(7) 505-11                                                                                                                                    |
|                                | Zhu, G., et al. Comparison of two kinds of orthotopic xenograft models for human ovarian cancer. 2014 European journal of gynaecological oncology 35(6) 724-7                                                                                                                                                              |
| <b>Include [no validation]</b> | Airley, R. E., et al. Hypoxia-regulated glucose transporter Glut-1 may influence cheity to some alkylating: results of EORTC (First Translational Award) study of the relevance of tumour hypoxia to the outcome of chemotherapy in human tumour-derived xenografts 2005 International journal of oncology 26(6) 1477-1484 |
|                                | Aloia, A., et al. The sialyl-glycolipid stage-specific embryonic antigen 4 marks a subpopulation of chemotherapy-resistant breast cancer cells with mesenchymal features 2015 Breast Cancer Research 17: doi: 10.1186/s13058-015-0652-6                                                                                    |
|                                | Baba, Y., et al. Panitumumab interaction with TAS-102 leads to combinational anticancer effects via blocking of EGFR-mediated tumor response to trifluridine 2017 Molecular Oncology 11(8) 1065-1077                                                                                                                       |
|                                | Benetatos, C. A., et al. Birinapant (TL32711), a bivalent SMAC mimetic, targets TRAF2-associated cIAPs, abrogates TNF-induced NF-kappabeta activation, and is active in patient-derived xenograft models 2014 Molecular Cancer Therapeutics 13(4) 867-879                                                                  |
|                                | Bertolini, G., et al. Microenvironment-modulated metastatic CD133<sup>+</sup>/CXCR4<sup>+</sup>/EpCAM<sup>-</sup>lung cancer-initiating cells sustain tumor dissemination and correlate with poor prognosis 2015 Cancer Research 75(17) 3636-3649                                                                          |

|                                                                                                                                                                                                                                                            |
|------------------------------------------------------------------------------------------------------------------------------------------------------------------------------------------------------------------------------------------------------------|
| Bieche, I., et al. Vasculature analysis of patient derived tumor xenografts using species-specific PCR assays: Evidence of tumor endothelial cells and atypical VEGFA-VEGFR1/2 signalings 2014 BMC Cancer 14: 178                                          |
| Blakely, C. M., et al. NF-kappaB-Activating complex engaged in response to EGFR oncogene inhibition drives tumor cell survival and residual disease in lung cancer 2015 Cell Reports 11(1) 98-110                                                          |
| Bonanno, L., et al. LKB1 Expression Correlates with Increased Survival in Patients with Advanced Non-Small Cell Lung Cancer Treated with Chemotherapy and Bevacizumab 2017 Clinical Cancer Research 23(13) 3316-3324                                       |
| Bosch, A., et al. PI3K inhibition results in enhanced estrogen receptor function and dependence in hormone receptor-positive breast cancer 2015 Science Translational Medicine 7(283) 283ra51. doi:10.1126/scitranslmed.aaa4442.                           |
| Bradford, J. R., et al. Whole transcriptome profiling of patient-derived xenograft models as a tool to identify both tumor and stromal specific biomarkers 2016 Oncotarget 7(15) 20773-20787                                                               |
| Bradshaw-Pierce, E. L., et al. Tumor P-glycoprotein correlates with efficacy of PF-3758309 in in vitro and in vivo models of colorectal cancer 2013 Frontiers in Pharmacology 4(22) doi:10.3389/fphar.2013.00022.                                          |
| Braso-Maristany, F., et al. PIM1 kinase regulates cell death, tumor growth and chemotherapy response in triple-negative breast cancer 2016 Nature Medicine 22(11) 1303-1313                                                                                |
| Breij, E. C., et al. An antibody-drug conjugate that targets tissue factor exhibits potent therapeutic activity against a broad range of solid tumors 2014 Cancer Research 74(4) 1214-26                                                                   |
| Brunker, P., et al. RG7386, a novel tetravalent FAP-DR5 antibody, effectively triggers FAP-dependent, avidity-driven DR5 hyperclustering and tumor cell apoptosis 2016 Molecular Cancer Therapeutics 15(5) 946-957                                         |
| Butler, D. E., et al. Inhibition of the PI3K/AKT/mTOR pathway activates autophagy and compensatory Ras/Raf/MEK/ERK signalling in prostate cancer 2017 Oncotarget 23(8) 56698-56713                                                                         |
| Chao, C., et al. Cystathionine-beta-synthase inhibition for colon cancer: Enhancement of the efficacy of aminooxyacetic acid via the prodrug approach 2016 Molecular Medicine 22: 361-379                                                                  |
| Chen, E. C., et al. KIT Signaling Promotes Growth of Colon Xenograft Tumors in Mice and Is Up-Regulated in a Subset of Human Colon Cancers 2015 Gastroenterology 149(3) 705e2-717e2                                                                        |
| Chen, H. J., et al. Comprehensive models of human primary and metastatic colorectal tumors in immunodeficient and immunocompetent mice by chemokine targeting 2015 Nature Biotechnology 33(6) 656-660                                                      |
| Chen, X., et al. Preclinical activity of the rational combination of apatinib in combination with CPT-11 in KRAS-mutant colorectal cancer patient-derived xenograft model 2017 International Journal of Clinical and Experimental Medicine 10(2) 2274-2284 |
| Chiron, M., et al. Differential antitumor activity of aflibercept and bevacizumab in patient-derived xenograft models of colorectal cancer 2014 Molecular Cancer Therapeutics 13(6) 1636-1644                                                              |
| Coussy, F., et al. Clinical value of R-spondins in triple-negative and metaplastic breast cancers 2017 British Journal of Cancer 116(12) 1595-1603                                                                                                         |
| Dalm, S. U., et al. SSTR-mediated Breast Cancer Imaging: Is There A Role For Radiolabeled SSTR Antagonists? 2017 Journal of Nuclear Medicine 58(10) 1609-1614                                                                                              |
| Damelin, M., et al. A PTK7-targeted antibody-drug conjugate reduces tumor-initiating cells and induces sustained tumor regressions 2017 Science Translational Medicine 9(372) eaag2611 DOI: 10.1126/scitranslmed.aag2611                                   |
| Damelin, M., et al. Delineation of a cellular hierarchy in lung cancer reveals an oncofetal antigen expressed on tumor-initiating cells 2011 Cancer Research 71(12) 4236-4246                                                                              |
| Dave, B., et al. Role of RPL39 in Metaplastic Breast Cancer 2017 Journal of the National Cancer Institute 109(6) djw292, <a href="https://doi.org/10.1093/jnci/djw292">https://doi.org/10.1093/jnci/djw292</a>                                             |

|                                                                                                                                                                                                                                                                                                   |
|---------------------------------------------------------------------------------------------------------------------------------------------------------------------------------------------------------------------------------------------------------------------------------------------------|
| Dave, B., et al. Targeting RPL39 and MLF2 reduces tumor initiation and metastasis in breast cancer by inhibiting nitric oxide synthase signaling 2014 Proceedings of the National Academy of Sciences of the United States of America 111(24) 8838-8843                                           |
| Delgado San Martin, J. A., et al. Tumour stromal morphology impacts nanomedicine cytotoxicity in patient-derived xenografts 2015 Nanomedicine: Nanotechnology, Biology, and Medicine 11(5) 1247-1252                                                                                              |
| Ding, X. F., et al. Validation of p27KIP1 expression levels as a candidate predictive biomarker of response to rapalogs in patient-derived breast tumor xenografts 2015 Tumor Biology 36: 1463. <a href="https://doi.org/10.1007/s13277-014-2580-y">https://doi.org/10.1007/s13277-014-2580-y</a> |
| Dong, X., et al. Antitumor effect of FP3 in combination with cetuximab on patient-derived tumor tissue xenograft models of primary colon carcinoma and related lymphatic and hepatic metastases 2012 International Journal of Molecular Medicine 30(1) 126-132                                    |
| Du, L., et al. Role of SUMO activating enzyme in cancer stem cell maintenance and self-renewal 2016 Nature Communications 7: 12326. doi:10.1038/ncomms12326.                                                                                                                                      |
| Elsarraj, H. S., et al. NEMO, a Transcriptional Target of Estrogen and Progesterone, Is Linked to Tumor Suppressor PML in Breast Cancer 2017 Cancer Research 77(14) 3802-3813                                                                                                                     |
| Faber, A. C., et al. Assessment of ABT-263 activity across a cancer cell line collection leads to a potent combination therapy for small-cell lung cancer 2015 Proceedings of the National Academy of Sciences of the United States of America 112(11) E1288-E1296                                |
| Fan, F., et al. The requirement for freshly isolated human colorectal cancer (CRC) cells in isolating CRC stem cells 2015 British Journal of Cancer 112(3) 539-546                                                                                                                                |
| Fichtner, I., et al. Establishment of patient-derived non-small cell lung cancer xenografts as models for the identification of predictive biomarkers 2008 Clinical Cancer Research 14(20) 6456-6468                                                                                              |
| Forest, A., et al. Intrinsic resistance to cixutumumab is conferred by distinct isoforms of the insulin receptor 2015 Molecular Cancer Research 13(12) 1615-1626                                                                                                                                  |
| Friese-Hamim, M., et al. The selective c-Met inhibitor tepotinib can overcome epidermal growth factor receptor inhibitor resistance mediated by aberrant c-Met activation in NSCLC models 2017 American Journal of Cancer Research 7(4) 962-972                                                   |
| Fu, C. H., et al. A novel oncogenic role of inositol phosphatase SHIP2 in ER-negative breast cancer stem cells: Involvement of JNK/Vimentin activation 2014 Stem Cells 32(8) 2048-2060                                                                                                            |
| Fujii, E., et al. The status of donor cancer tissues affects the fate of patient-derived colorectal cancer xenografts in NOG mice 2014 Experimental Animals 64(2) 181-190                                                                                                                         |
| Gao, M., et al. Expression analysis and clinical significance of eIF4E, VEGF-C, E-cadherin and MMP-2 in colorectal adenocarcinoma 2016 Oncotarget 7(51) 85502-85514                                                                                                                               |
| Gaponova, A. V., et al. A novel HSP90 inhibitor-drug conjugate to SN38 is highly effective in small cell lung cancer 2016 Clinical Cancer Research 22(20) 5120-5129                                                                                                                               |
| Goetz, M. P., et al. Tumor Sequencing and Patient-Derived Xenografts in the Neoadjuvant Treatment of Breast Cancer 2017 Journal of the National Cancer Institute 109(7) djw306. doi:10.1093/jnci/djw306.                                                                                          |
| Guan, Z., et al. Optimizing dosage regimen for FP3 based on vascular normalization window monitored by ratio of Ang-1 to Ang-2 2017 International Journal of Clinical and Experimental Medicine 10(2) 2156-2164                                                                                   |
| Guerrera, F., et al. The influence of tissue ischemia time on RNA integrity and patient-derived xenografts (PDX) engraftment rate in a non-small cell lung cancer (NSCLC) Biobank 2016 PLoS ONE 11(1) e0145100. doi:10.1371/journal.pone.0145100.                                                 |
| Guo, S., et al. Cetuximab response in CRC patient-derived xenografts seems predicted by an expression-based Ras pathway signature 2016 Oncotarget 7(31) 50575-50581                                                                                                                               |
| Guo, S., et al. Molecular pathology of patient tumors, patient-derived xenografts, and cancer cell lines 2016 Cancer Research 76(16) 4619-4626                                                                                                                                                    |
| Hall, A. B., et al. Potentiation of tumor responses to DNA damaging therapy by the selective ATR inhibitor VX-970 2014 Oncotarget 5(14) 5674-5685                                                                                                                                                 |
| Han, Z., et al. Inhibition of STAT3 signaling targets both tumor-initiating and differentiated cell populations in prostate cancer 2014 Oncotarget 5(18) 8416-8428                                                                                                                                |

|                                                                                                                                                                                                                                                                                                            |
|------------------------------------------------------------------------------------------------------------------------------------------------------------------------------------------------------------------------------------------------------------------------------------------------------------|
| Herrera-Abreu, M. T., et al. Early adaptation and acquired resistance to CDK4/6 inhibition in estrogen receptor-positive breast cancer 2016 <i>Cancer Research</i> 76(8) 2301-2313                                                                                                                         |
| Hiroshima, Y., et al. Successful fluorescence-guided surgery on human colon cancer patient-derived orthotopic xenograft mouse models using a fluorophore-conjugated anti-CEA antibody and a portable imaging system 2014 <i>Journal of Laparoendoscopic and Advanced Surgical Techniques</i> 24(4) 241-247 |
| Holton, A. B., et al. Microfluidic biopsy trapping device for the real-time monitoring of tumor microenvironment 2017 <i>PLoS ONE</i> 12(1) e0169797. doi:10.1371/journal.pone.0169797.                                                                                                                    |
| Hu, S., et al. Antagonism of EGFR and Notch limits resistance to EGFR inhibitors and radiation by decreasing tumor-initiating cell frequency 2017 <i>Science Translational Medicine</i> 9(380) eaag0339 DOI: 10.1126/scitranslmed.aag0339                                                                  |
| Hu, Y., et al. PARP1-driven poly-ADP-ribosylation regulates BRCA1 function in homologous recombination-mediated DNA repair 2014 <i>Cancer Discovery</i> 4(12) 1430-1447                                                                                                                                    |
| Hu, Y., et al. Fibroblast-derived exosomes contribute to chemoresistance through priming cancer stem cells in colorectal cancer 2015 <i>PLoS ONE</i> 10(5) e0125625. <a href="https://doi.org/10.1371/journal.pone.0125625">https://doi.org/10.1371/journal.pone.0125625</a>                               |
| Imamura, Y., et al. Comparison of 2D- and 3D-culture models as drug-testing platforms in breast cancer 2015 <i>Oncology Reports</i> 33(4) 1837-1843                                                                                                                                                        |
| Ionkina, A. A., et al. Efficacy and molecular mechanisms of differentiated response to the Aurora and angiogenic kinase inhibitor ENMD-2076 in preclinical models of p53-mutated triple-negative breast cancer 2017 <i>Frontiers in Oncology</i> 7: 94                                                     |
| Isella, C., et al. Selective analysis of cancer-cell intrinsic transcriptional traits defines novel clinically relevant subtypes of colorectal cancer 2017 <i>Nature Communications</i> 8: 15107                                                                                                           |
| Jia, Y., et al. EGF816 exerts anticancer effects in non-small cell lung cancer by irreversibly and selectively targeting primary and acquired activating mutations in the EGF receptor 2016 <i>Cancer Research</i> 76(6) 1591-1602                                                                         |
| Johnson, S. F., et al. CDK12 Inhibition Reverses De Novo and Acquired PARP Inhibitor Resistance in BRCA Wild-Type and Mutated Models of Triple-Negative Breast Cancer 2016 <i>Cell Reports</i> 17(9) 2367-2381                                                                                             |
| Karagiannis, G. S., et al. Neoadjuvant chemotherapy induces breast cancer metastasis through a TMEM-mediated mechanism 2017 <i>Science Translational Medicine</i> 9(397) 5                                                                                                                                 |
| Ketao, J., et al. Differential response to EGFR- And VEGF-targeted therapies in patient-derived tumor tissue xenograft models of colon carcinoma and related metastases 2012 <i>International Journal of Oncology</i> 41(2) 583-588                                                                        |
| Kim, H. Y., et al. Evaluation of anti-tumorigenic activity of BP3B against colon cancer with patient-derived tumor xenograft model 2016 <i>BMC Complementary and Alternative Medicine</i> 16: 473                                                                                                          |
| Kim, J., et al. Heterogeneous perivascular cell coverage affects breast cancer metastasis and response to chemotherapy 2016 <i>Jci Insight</i> 1(21) e90733                                                                                                                                                |
| Kroon, P., et al. JAK-STAT blockade inhibits tumor initiation and clonogenic recovery of prostate cancer stem-like cells 2013 <i>Cancer Research</i> 73(16) 5288-5298                                                                                                                                      |
| Kung, P. P., et al. Chemogenetic evaluation of the mitotic kinesin CENP-E reveals a critical role in triple-negative breast cancer 2014 <i>Molecular Cancer Therapeutics</i> 13(8) 2104-2115                                                                                                               |
| Lee, K. J., et al. Application of peptide displaying phage as a novel diagnostic probe for human lung adenocarcinoma 2016 <i>Amino Acids</i> 48(4) 1079-1086                                                                                                                                               |
| Lee, M. S., et al. Efficacy of the combination of MEK and CDK4/6 inhibitors in vitro and in vivo in KRAS mutant colorectal cancer models 2016 <i>Oncotarget</i> 7(26) 39595-39608                                                                                                                          |
| Lee, S. C., et al. Essential role of insulin-like growth factor 2 in resistance to histone deacetylase inhibitors 2016 <i>Oncogene</i> 35(42) 5515-5526                                                                                                                                                    |
| Li, C., et al. CD54-NOTCH1 axis controls tumor initiation and cancer stem cell functions in human prostate cancer 2017 <i>Theranostics</i> 7(1) 67-80                                                                                                                                                      |
| Li, J., et al. Comparing Patient-Derived Xenograft and Computational Response Prediction for Targeted Therapy in Patients of Early-Stage Large Cell Lung Cancer 2016 <i>Clinical Cancer Research</i> 22(9) 2167-2176                                                                                       |
| Li, R., et al. Modulation of Bax and mTOR for cancer therapeutics 2017 <i>Cancer Research</i> 77(11) 3001-3012                                                                                                                                                                                             |

|                                                                                                                                                                                                                                                                                                                                          |
|------------------------------------------------------------------------------------------------------------------------------------------------------------------------------------------------------------------------------------------------------------------------------------------------------------------------------------------|
| Lieu, C. H., et al. Antitumor activity of a potent MEK inhibitor, TAK-733, against colorectal cancer cell lines and patient derived xenografts 2015 <i>Oncotarget</i> 6(33) 34561-34572                                                                                                                                                  |
| Lim, D. Y., et al. A natural small molecule, catechol, induces c-Myc degradation by directly targeting ERK2 in lung cancer 2016 <i>Oncotarget</i> 7(23) 35001-35014                                                                                                                                                                      |
| Liu, J., et al. Lung cancer tumorigenicity and drug resistance are enhanced through ALDH1A1 <sup>hi</sup> CD44 <sup>hi</sup> tumor initiating cells 2013 <i>Oncotarget</i> 4(10) 1686-1699                                                                                                                                               |
| Liu, R., et al. Mifepristone suppresses basal triple-negative breast cancer stem cells by down-regulating KLF5 expression 2016 <i>Theranostics</i> 6(4) 533-544                                                                                                                                                                          |
| Lopez-Albaitero, A., et al. Overcoming resistance to HER2-targeted therapy with a novel HER2/CD3 bispecific antibody 2017 <i>Oncoimmunology</i> 6(3) DOI: 10.1080/2162402X.2016.1267891                                                                                                                                                  |
| Manuel, C. A., et al. Procedure for horizontal transfer of patient-derived xenograft tumors to eliminate corynebacterium bovis 2017 <i>Journal of the American Association for Laboratory Animal Science</i> 56(2) 166-172                                                                                                               |
| Mattern, J., et al. Occurrence of a multidrug-resistant phenotype in human lung xenografts 1987 <i>British Journal of Cancer</i> 56(4) 407-411                                                                                                                                                                                           |
| Mattie, M., et al. The discovery and preclinical development of ASG-5ME, an antibody-drug conjugate targeting SLC44A4-positive epithelial tumors including pancreatic and prostate cancer 2016 <i>Molecular Cancer Therapeutics</i> 15(11) 2679-2687                                                                                     |
| Metildi, C. A. and Kaushal, S. and Luiken, G. A. and Talamini, M. A. and Hoffman, R. M. and Bouvet, M. Fluorescently labeled chimeric anti-CEA antibody improves detection and resection of human colon cancer in a patient-derived orthotopic xenograft (PDOX) nude mouse model 2014 <i>Journal of Surgical Oncology</i> 109(5) 451-458 |
| Min, H. Y., et al. Essential role of DNA methyltransferase 1-mediated transcription of insulin-like growth factor 2 in resistance to histone deacetylase inhibitors 2017 <i>Clinical Cancer Research</i> 23(5) 1299-1311                                                                                                                 |
| Min, H. Y., et al. Targeting the insulin-like growth factor receptor and Src signaling network for the treatment of non-small cell lung cancer 2015 <i>Molecular Cancer</i> 14: 113. doi:10.1186/s12943-015-0392-3.                                                                                                                      |
| Misale, S., et al. Vertical suppression of the EGFR pathway prevents onset of resistance in colorectal cancers 2015 <i>Nature Communications</i> 6: e0135817. <a href="https://doi.org/10.1371/journal.pone.0135817">https://doi.org/10.1371/journal.pone.0135817</a>                                                                    |
| Moro, M., et al. Combination treatment with all-trans retinoic acid prevents cisplatin-induced enrichment of CD133 <sup>+</sup> tumor-initiating cells and reveals heterogeneity of cancer stem cell compartment in lung cancer 2015 <i>Journal of Thoracic Oncology</i> 10(7) 1027-1036                                                 |
| Murone, M., et al. 0617B inhibits growth of STAT3-driven solid tumors through combined inhibition of JAK, SRC, and class III/V receptor tyrosine kinases 2016 <i>Molecular Cancer Therapeutics</i> 15(10) 2334-2343                                                                                                                      |
| Nwogu, C., et al. Photodynamic therapy of human lung cancer xenografts in mice 2016 <i>Journal of Surgical Research</i> 200(1) 8-12                                                                                                                                                                                                      |
| Paquet, C., et al. Effect of anti-cancer drugs on microglia in patient-derived breast cancer xenografted mouse models 2017 <i>Neuropathology</i> 37(1) 91-93                                                                                                                                                                             |
| Pearson, A., et al. High-level clonal FGFR amplification and response to FGFR inhibition in a translational clinical trial 2016 <i>Cancer Discovery</i> 6(8) 838-851                                                                                                                                                                     |
| Perera, T. P. S., et al. Discovery & pharmacological characterization of JNJ-42756493 (Erdafitinib), a functionally selective small-molecule FGFR family inhibitor 2017 <i>Molecular Cancer Therapeutics</i> 16(6) 1010-1020                                                                                                             |
| Pitts, T. M., et al. Dual pharmacological targeting of the map kinase and pi3k/mtor pathway in preclinical models of colorectal cancer 2014 <i>PLoS ONE</i> 9(11) e113037. <a href="https://doi.org/10.1371/journal.pone.0113037">https://doi.org/10.1371/journal.pone.0113037</a>                                                       |
| Pitts, T. M., et al. Development of an integrated genomic classifier for a novel agent in colorectal cancer: Approach to individualized therapy in early development 2010 <i>Clinical Cancer Research</i> 16(12) 3193-3204                                                                                                               |

|                                                                                                                                                                                                                                                                                                                            |
|----------------------------------------------------------------------------------------------------------------------------------------------------------------------------------------------------------------------------------------------------------------------------------------------------------------------------|
| <p>Qiu, M., et al. Specific inhibition of Notch1 signaling enhances the antitumor efficacy of chemotherapy in triple negative breast cancer through reduction of cancer stem cells 2013 <i>Cancer Letters</i> 328(2) 261-270</p>                                                                                           |
| <p>Quackenbush, K. S., et al. The novel tankyrase inhibitor (AZ1366) enhances irinotecan activity in tumors that exhibit elevated tankyrase and irinotecan resistance 2016 <i>Oncotarget</i> 7(19) 28273-28285</p>                                                                                                         |
| <p>Reno, T. A., et al. The triptolide derivative MRx102 inhibits Wnt pathway activation and has potent anti-tumor effects in lung cancer 2016 <i>BMC Cancer</i> 16(439)<br/> <a href="https://dx.doi.org/10.1186%2Fs12885-016-2487-7">https://dx.doi.org/10.1186%2Fs12885-016-2487-7</a></p>                               |
| <p>Rolff, J., et al. Preclinical Study of a Combination of Erlotinib and Bevacizumab in Early Stages of Unselected Non-Small Cell Lung Cancer Patient-Derived Xenografts 2016 <i>Targeted Oncology</i> 11(4) 507-514</p>                                                                                                   |
| <p>Rothwell, D. G., et al. Evaluation and validation of a robust single cell RNA-amplification protocol through transcriptional profiling of enriched lung cancer initiating cells 2014 <i>BMC Genomics</i> 15(1129) <a href="https://doi.org/10.1186/1471-2164-15-1129">https://doi.org/10.1186/1471-2164-15-1129</a></p> |
| <p>Ruggles, K. V., et al. An analysis of the sensitivity of proteogenomic mapping of somatic mutations and novel splicing events in cancer 2016 <i>Molecular and Cellular Proteomics</i> 15(3) 1060-1071</p>                                                                                                               |
| <p>Sai, J., et al. PI3K Inhibition Reduces Mammary Tumor Growth and Facilitates Antitumor Immunity and Anti-PD1 Responses 2017 <i>Clinical Cancer Research</i> 23(13) 3371-3384</p>                                                                                                                                        |
| <p>Salvador, M. A. et al., et al. The histone deacetylase inhibitor abexinostat induces cancer stem cells differentiation in breast cancer with low Xist expression 2013 <i>Clinical Cancer Research</i> 19(23) 6520-31</p>                                                                                                |
| <p>Sandercock, A. M., et al. Identification of anti-tumour biologics using primary tumour models, 3-D phenotypic screening and image-based multi-parametric profiling 2015 <i>Molecular Cancer</i> 14: 147</p>                                                                                                             |
| <p>Santag, S., et al. BAY 1143269, a novel MNK1 inhibitor, targets oncogenic protein expression and shows potent anti-tumor activity 2017 <i>Cancer Letters</i> 390: 21-29</p>                                                                                                                                             |
| <p>Sapra, P., et al. Long-term tumor regression induced by an antibody-drug conjugate that targets 5T4, an oncofetal antigen expressed on tumor-initiating cells 2013 <i>Molecular Cancer Therapeutics</i> 12(1) 38-47</p>                                                                                                 |
| <p>Schmieder, R., et al. Regorafenib (BAY 73-4506): Antitumor and antimetastatic activities in preclinical models of colorectal cancer 2014 <i>International Journal of Cancer</i> 135(6) 1487-1496</p>                                                                                                                    |
| <p>Seguin, L., et al. An integrin beta 3-KRAS-Ra1B complex drives tumour stemness and resistance to EGFR inhibition 2014 <i>Nature Cell Biology</i> 16(5) 457-468</p>                                                                                                                                                      |
| <p>Shao, H., et al. Improved response to nab-paclitaxel compared with cremophor-solubilized paclitaxel is independent of secreted protein acidic and rich in cysteine expression in non-small cell lung cancer 2011 <i>Journal of Thoracic Oncology</i> 6(6) 998-1005</p>                                                  |
| <p>Sharma, S. K., et al. Noninvasive Interrogation of DLL3 Expression in Metastatic Small Cell Lung Cancer 2017 <i>Cancer Research</i> 77(14) 3931-3941</p>                                                                                                                                                                |
| <p>Spreafico, A., et al. Rational combination of a MEK inhibitor, selumetinib, and the wnt/calcium pathway modulator, cyclosporin a, in preclinical models of colorectal cancer 2013 <i>Clinical Cancer Research</i> 19(15) 4149-4162</p>                                                                                  |
| <p>Streeter, J. E., et al. A comparative evaluation of ultrasound molecular imaging, perfusion imaging, and volume measurements in evaluating response to therapy in patient-derived xenografts 2013 <i>Technology in Cancer Research and Treatment</i> 12(4) 311-321</p>                                                  |
| <p>Tentler, J. J., et al. P53 family members regulate phenotypic response to Aurora kinase a inhibition in Triple-negative breast cancer 2015 <i>Molecular Cancer Therapeutics</i> 14(5) 1117-1129</p>                                                                                                                     |
| <p>Thomas, M. L., et al. Citral reduces breast tumor growth by inhibiting the cancer stem cell marker ALDH1A3 2016 <i>Molecular Oncology</i> 10(9) 1485-1496</p>                                                                                                                                                           |
| <p>Tignanelli, C. J., et al. KRAS and PIK3CA mutation frequencies in patient-derived xenograft models of pancreatic and colorectal cancer are reflective of patient tumors and stable across passages 2014 <i>American Surgeon</i> 80(9) 873-877</p>                                                                       |
| <p>Tominaga, K., et al. Addiction to the IGF2-ID1-IGF2 circuit for maintenance of the breast cancer stem-like cells 2017 <i>Oncogene</i> 36(9) 1276-1286</p>                                                                                                                                                               |

|              |                                                                                                                                                                                                                                                                               |
|--------------|-------------------------------------------------------------------------------------------------------------------------------------------------------------------------------------------------------------------------------------------------------------------------------|
|              | Ugol'kov, A., et al. GSK-3 inhibition overcomes chemoresistance in human breast cancer 2016 <i>Cancer Letters</i> 380(2) 384-392                                                                                                                                              |
|              | Wang, K., et al. PEST domain mutations in Notch receptors comprise an oncogenic driver segment in triple-negative breast cancer sensitive to a gamma-secretase inhibitor 2015 <i>Clinical Cancer Research</i> 21(6) 1487-1496                                                 |
|              | Wong, H., et al. Pharmacokinetic-pharmacodynamic analysis of vismodegib in preclinical models of mutational and ligand-dependent Hedgehog pathway activation 2011 <i>Clinical Cancer Research</i> 17(14) 4682-4692                                                            |
|              | Wright, P. K., et al. 17beta-estradiol regulates giant vesicle formation via estrogen receptor-alpha in human breast cancer cells 2014 <i>Oncotarget</i> 5(10) 3055-3065                                                                                                      |
|              | Xiao, Y., et al. Dependence of tumor cell lines and patient-derived tumors on the NAD salvage pathway renders them sensitive to NAMPT inhibition with GNE-618 2013 <i>Neoplasia (New York)</i> 15(10) 1151-60                                                                 |
|              | Xu, H., et al. CX-5461 is a DNA G-quadruplex stabilizer with selective lethality in BRCA1/2 deficient tumours 2017 <i>Nature Communications</i> 8: <a href="http://dx.doi.org/10.1038/ncomms14432">http://dx.doi.org/10.1038/ncomms14432</a>                                  |
|              | Xu, Y. C., et al. Integration of receptor tyrosine kinases determines sensitivity to PI3Kalpha-selective inhibitors in breast cancer 2017 <i>Theranostics</i> 7(4) 974-986                                                                                                    |
|              | Ye, X. S., et al. A novel Eg5 inhibitor (LY2523355) causes mitotic arrest and apoptosis in cancer cells and shows potent antitumor activity in xenograft tumor models 2015 <i>Molecular Cancer Therapeutics</i> 14(11) 2463-2472                                              |
|              | Zhang, C. G., et al. Nepetaefolins A-J, Cytotoxic Chinane and Abietane Diterpenoids from <i>Caryopteris nepetaefolia</i> 2017 <i>Journal of Natural Products</i> 80(6) 1742-1749                                                                                              |
|              | Zhang, P., et al. Upregulation of programmed cell death ligand 1 promotes resistance response in non-small-cell lung cancer patients treated with neo-adjuvant chemotherapy 2016 <i>Cancer Science</i> 107(11) 1563-1571                                                      |
|              | Zhang, Y., et al. PP2AC Level Determines Differential Programming of p38-TSC-mTOR Signaling and Therapeutic Response to p38-Targeted Therapy in Colorectal Cancer 2015 <i>EBioMedicine</i> 2(12) 1944-1956                                                                    |
|              | Zhang, Y., et al. 244-MPT overcomes gefitinib resistance in non-small cell lung cancer cells 2015 <i>Oncotarget</i> 6(42) 44274-44288                                                                                                                                         |
|              | Zhou, X., et al. Galectin-1 is overexpressed in CD133 <sup>+</sup> human lung adenocarcinoma cells and promotes their growth and invasiveness 2015 <i>Oncotarget</i> 6(5) 3111-3122                                                                                           |
|              | Zhu, H., et al. Suppressing the growth of rectal cancer xenografts derived from patient tumors by an adenovector expressing small hairpin RNA targeting Bcl-XL 2012 <i>Journal of Gene Medicine</i> 14(12) 761-768                                                            |
|              | Zhu, Q, et al. Pathway activation strength is a novel independent prognostic biomarker for cetuximab sensitivity in colorectal cancer patients 2015 <i>Human Genome Variation</i> 2() <a href="http://dx.doi.org/10.1038/hgv.2015.9">http://dx.doi.org/10.1038/hgv.2015.9</a> |
|              | Hindupur, Sravanth K., et al. Identification of a novel AMPK-PEA15 axis in the anoikis-resistant growth of mammary cells. 2014 <i>Breast cancer research: BCR</i> 16(4) 420                                                                                                   |
|              | Meetze, K., et al. Neuregulin 1 expression is a predictive biomarker for response to AV-203, an ERBB3 inhibitory antibody, in human tumor models. 2015 <i>Clinical cancer research: an official journal of the American Association for Cancer Research</i> 21(5) 1106-14     |
|              | Shirakawa, K., et al. Inflammatory breast cancer: vasculogenic mimicry and its hemodynamics of an inflammatory breast cancer xenograft model. 2003 <i>Breast cancer research: (3)</i> 136-9                                                                                   |
| Unobtainable | Abe, J., et al. A novel vitamin D3 analog, 22-oxa-1,25-dihydroxyvitamin D3, inhibits the growth of human breast cancer in vitro and in vivo without causing hypercalcemia 1991 <i>Endocrinology</i> 129(2) 832-837                                                            |
|              | Balkwill, F. R., et al. Human interferon inhibits the growth of established human breast tumours in the nude mouse 1982 <i>International Journal of Cancer</i> 30(2) 231-235                                                                                                  |
|              | Brand M., T., et al. The receptor tyrosine kinase AXL mediates nuclear translocation of the epidermal growth factor receptor 2017 <i>Science Signaling</i> 10(460) eaag1064 DOI: 10.1126/scisignal.aag106                                                                     |
|              | Decaudin, D. Primary human tumor xenografted models ('tumorgrafts') for good management of patients with cancer 2011 <i>Anti-Cancer Drugs</i> 22(9) 827-841                                                                                                                   |

|                                                                                                                                                                                                                                                                      |
|----------------------------------------------------------------------------------------------------------------------------------------------------------------------------------------------------------------------------------------------------------------------|
| Eigenmann, M. J., et al. Combining nonclinical experiments with translational PKPD modeling to differentiate erlotinib and gefitinib 2016 <i>Molecular Cancer Therapeutics</i> 15(12) 3110-3119                                                                      |
| Esmaili, M., et al. In vivo <sup>31</sup> P Magnetic Resonance Spectroscopic Imaging (MRSI) for metabolic profiling of human breast cancer xenografts 2015 <i>Journal of Magnetic Resonance Imaging</i> 41(3) 601-609                                                |
| Jackson, H., et al. Novel bispecific domain antibody to LRP6 inhibits wnt and r-spondin ligand-induced wnt signaling and tumor growth 2016 <i>Molecular Cancer Research</i> 14(9) 859-868                                                                            |
| Katsiampoura, A., et al. Modeling of Patient-Derived Xenografts in Colorectal Cancer 2017 <i>Molecular Cancer Therapeutics</i> 16(7) 1435-1442                                                                                                                       |
| Kuesters, S., et al. Correlation of ErbB2 gene status, mRNA and protein expression in a panel of >100 human tumor xenografts of different origin 2006 <i>Onkologie</i> 29(6) 249-256                                                                                 |
| Lloyd, I. E., et al. X-Ray of Excised Cancerous Breast Tissue Does Not Affect Clinical Biomarker Expression 2017 <i>Applied Immunohistochemistry and Molecular Morphology</i> : DOI: 10.1097/PAI.0000000000000454                                                    |
| Lu, J., et al. Reactivation of p53 by MDM2 inhibitor MI-77301 for the treatment of endocrine-resistant breast cancer 2016 <i>Molecular Cancer Therapeutics</i> 15(12) 2887-2893                                                                                      |
| Mukohyama, J., et al. Effect of xenotransplantation site on microRNA expression of human colon cancer stem cells 2016 <i>Anticancer Research</i> 36(7) 3679-3686                                                                                                     |
| Pereira, C., et al. Genomic profiling of patient-derived xenografts for lung cancer identifies B2M inactivation impairing immunorecognition 2017 <i>Clinical Cancer Research</i> 23(12) 3203-3213                                                                    |
| Raimbourg, J., et al. Sensitization of EGFR wild-type non-small cell lung cancer cells to EGFR-tyrosine kinase inhibitor erlotinib 2017 <i>Molecular Cancer Therapeutics</i> 16(8) 1634-1644                                                                         |
| Sargent, J. M., et al. Ex vivo effects of the dual topoisomerase inhibitor tafluposide (F 11782) on cells isolated from fresh tumor samples taken from patients with cancer 2003 <i>Anti-Cancer Drugs</i> 14(6) 467-473                                              |
| Wei, X., et al. PSCA and MUC1 in non-small-cell lung cancer as targets of chimeric antigen receptor T cells 2017 <i>Oncol Immunology</i> 6(3) DOI: 10.1080/2162402X.2017.1284722                                                                                     |
| Weiswald, L. B., et al. Inactivation of the kinase domain of CDK10 prevents tumor growth in a preclinical model of colorectal cancer, and is accompanied by downregulation of Bcl-2 2017 <i>Molecular Cancer Therapeutics</i> 29: doi: 10.1158/1535-7163.MCT-16-0666 |
| Wiedemann, G., et al. Hyperthermia enhances mitoxantrone cytotoxicity on human breast carcinoma and sarcoma xenografts in nude mice 1992 <i>International Journal of Radiation Oncology Biology Physics</i> 24(4) 669-673                                            |
| Zhang, J. S., et al. Experimental radiotherapy and metastasis of human lung cancer xenografts in nude mice 1994 <i>Chinese medical journal</i> 107(7) 491-495                                                                                                        |
| Balkwill, F R., et al. Effects of tumour necrosis factor on human tumour xenografts in nude mice. 1987 <i>Ciba Foundation symposium</i> 131: 154-69                                                                                                                  |
