# Supplementary material for: A systematic review of the validity of patient derived xenograft (PDX) models: the implications for translational research and personalised medicine
Source: PubMed Central journal article supplement (PMC6252062; doi:10.7717/peerj.5981), 2018-11-21
Supplement: peerj-06-5981-s007.pdf [file peerj-06-5981-s007.pdf]

**Supplemental Table S7: Primary Outgrowth Rates for PDX Models**

A. Breast PDX (primary tumours only)

| Study                 | Sample type | Mouse strain      | Engraftment site | Donor pathology                                             | Donor treatment              | N sample | Outgrowth rate (%) | N       | Definition of outcome                                                                                                                                      |
|-----------------------|-------------|-------------------|------------------|-------------------------------------------------------------|------------------------------|----------|--------------------|---------|------------------------------------------------------------------------------------------------------------------------------------------------------------|
| Shirakawa 2001        | TF          | Balb/c nude, SCID | subcutaneous     | High grade inv DC (100%)                                    | NR                           | 10       | 10                 | patient | exponential growth                                                                                                                                         |
| Zhang 2013            | TF          | SCID/Bg           | orthotopic       | IDC (89%)                                                   | Previous treatment           | 169      | 41                 | patient | A surviving tissue fragment > 1 mm in diameter and shown to be proliferative (Ki67+)                                                                       |
| Valdez 2011*          | IC          | NSG               | orthotopic       | DC (100%)                                                   | NR                           | 8        | 75                 | patient | 8 weeks growth                                                                                                                                             |
| Valdez 2011*          | IC          | NSG               | orthotopic       | DC (100%)                                                   | NR                           | 34       | 42                 | tissue  | 8 weeks growth                                                                                                                                             |
| Bergamaschi 2009*     | TF          | SCID              | subcutaneous     | IDC (76%); ILC (14%); MUC (10%)                             | NR                           | 30       | 20                 | PDX     | P0-P1. A diameter of approximately 15 mm.                                                                                                                  |
| Charafe-Jauffret 2013 | IC          | NSG               | orthotopic       | IDC (83.2%); ILC (7%); mixed (1.4%); MED (1.4%); other (7%) | CT (76%); IR (80%); HT (55%) | 74       | 27                 | tissue  | 12 mm in the largest diameter (<1000 mm <sup>3</sup> ),                                                                                                    |
| Visonneau 1998        | TF          | SCID, NOD/SCID    | subcutaneous     | Infiltrating carcinoma (13%); IDC (74%); mixed (13%)        | NR                           | 16       | 50                 | patient | Signs of heavy tumor burden (> 10% body weight), ulceration of the skin with bleeding, and/or signs of severe respiratory distress, weakness and lethargy. |
| Patsialou 2012        | TF          | SCID              | orthotopic       | ILC (13%), IDC (87%)                                        | NR                           | 29       | 27.6               | tissue  | samples that grew from 1st implantation                                                                                                                    |
| McAuliffe 2015        | TF          | Balb/c nude       | subcutaneous     | NR                                                          | Neoadjuvant therapy (50%)    | 48       | 27                 | tissue  | tumor growth at the site of implantation                                                                                                                   |
| Cottu 2012            | TF          | Swiss nude        | orthotopic       | NR                                                          | NR                           | 164      | 15                 | patient | NR                                                                                                                                                         |
| du Manoir 2014*       | TF          | Swiss nude        | subcutaneous     | NR                                                          | NR                           | 130      | 30                 | patient | A maximum of 2000 mm <sup>3</sup>                                                                                                                          |
| Eyre 2016*            | TF          | NSG               | subcutaneous     | NR                                                          | RT (2%), CT (4%), HT (13%)   | 120      | 38                 | tissue  | 1.3cm <sup>3</sup>                                                                                                                                         |

\*possible oestrogen supplementation. TF = tissue fragments; IC = isolated cells. IDC = invasive ductal carcinoma; ILC = invasive lobular carcinoma; DC = ductal carcinoma; mets = metastases; AC = adenocarcinoma; inv= invasive; MUC = mucinous; MED = medullary. CT = chemotherapy; IR = irradiation; HT = hormone therapy. Bold = studies with unclear concerns for model validity; grey shade = studies with high risk of concern for model validity.

B. Colon PDX (primary tumours only, all subcutaneous using tissue fragments unless otherwise indicated)

| Study              | Mouse strain            | Donor pathology                          | Donor Treatment | N sample | Outgrowth rate (%) | N       | Definition of outcome |
|--------------------|-------------------------|------------------------------------------|-----------------|----------|--------------------|---------|-----------------------|
| Davies 1981        | nude mice               | AC (100%)                                | NR              | 9        | 44                 | PDX     | NR                    |
| Lee 2014           | Balb/c nude or NOD/SCID | AC (100%)                                | TN              | 10       | 100                | patient | 1000 mm3              |
| Mukohyama 2016     | NOD/SCID                | AC (100%)                                | NR              | 5        | 60                 | patient | 1-2 cm                |
| Mukohyama 2016**   | NSG                     | AC (100%)                                | NR              | 8        | 50                 | patient | 1-2 cm                |
| Zhou 2011          | Balb/c nude             | AC (100%)                                | NR              | 21       | 14                 | patient | reached 1 cm diameter |
| Jin 2011           | Balb/c nude             | mAC (100%)                               | NR              | 20       | 60                 | PDX     | >1500 mm3             |
| Chou 2013*         | NSG                     | AC (65%), mAC (23%), AC/NE (5%), NE (5%) | CT (18%)        | 28       | 61                 | patient | 2 cm                  |
| Guan 2016          | Balb/c nude             | AC (89%), mAC (11%)                      |                 | 85       | 58.5               | patient | 150mm3                |
| Linnebacher 2010   | NOD/SCID                | AC (98%); LNEC (2%)                      | TN              | 48       | 27                 | patient | reached 1-1.5cm3      |
| Puig 2013*         | NOD/SCID                | AC (75%); mAC (25%)                      | CT (50%)        | 32       | 84                 | patient | reached 1cm3          |
| Zhang 2015         | NOD/SCID                | AC (97%), mAC (3%)                       | CT (3%)         | 43       | 70                 | patient | 500-1000 mm3          |
| Dangles-Marie 2007 | Swiss nude              | NR                                       | NR              | 11       | 82                 | patient | NR                    |
| Gock 2016          | NMRI nude               | NR                                       | CT naïve        | 20       | 40                 | Tissue  | 1-1.5cm3              |
| Julien 2012        | Swiss nude              | NR                                       | CT (23%)        | 58       | 60                 | patient | 800 -1500 mm3         |

\*Isolated cells, subrenal and subcutaneous. \*\* minced tissue. AC = adenocarcinoma; mAC=mucinous adenocarcinoma; CaG=carcinoma gingiva; Ca= carcinoid; LNEC = large cell neuroendocrine carcinoma; NE = neuroendocrine ; squamous cell carcinoma =SCC, combined small cell carcinoma =SCC; denosquamous =DS, pleomorphic carcinoma =PC . CT = chemotherapy; TN = treatment naïve. Bold = studies with unclear concerns for model validity; grey shade = studies with high risk of concern for model validity.

C. Lung PDX (primary tumours only, all tissue fragments)

| Study      | Mouse strain | Engraftment site | Donor pathology | Donor treatment | N sample | Outgrowth rate (%) | N       | Definition of outcome                                                           |
|------------|--------------|------------------|-----------------|-----------------|----------|--------------------|---------|---------------------------------------------------------------------------------|
| Anderson   | NOD/SCID     | orthotopic       | 100% SCC        | NR              | 10       | 60                 | patient | confirmed SCLC tumours (800-1500mm3)                                            |
| Russo 2015 | CD1 nude     | subrenal         | 100% SQCC       | TN              | 12       | 92                 | PDX     | first generation xenografts which closely resembled the parental tumour by H &E |
| Russo 2015 | CD1 nude     | subrenal         | 100% AC         | TN              | 14       | 29                 | PDX     | first generation xenografts which closely resembled the parental tumour by H &E |
| Dong 2010  | NOD/SCID     | subrenal         | 100% NSCLC      | TN              | 527      | 90                 | PDX     | 49 days growth                                                                  |

|                |            |              |                                                                                    |                 |    |    |         |                                                                                                                  |
|----------------|------------|--------------|------------------------------------------------------------------------------------|-----------------|----|----|---------|------------------------------------------------------------------------------------------------------------------|
| Roife 2017     | NOD/SCID   | subcutaneous | 100% NSCLC                                                                         | Treatment (25%) | 16 | 50 | patient | 1.5cm <sup>3</sup> tumour                                                                                        |
| Cutz, 2006     | NOD/SCID   | subrenal     | 7% squamous metaplasia; 7% carcinoid; 35% SQCC; 14% AC; 21% SCC; 7% carcinosarcoma | 21% CT, 14% RT  | 14 | 78 | patient | First-generation implant growth was assessed by palpation and harvested at 30 days or up to 60 days postgrafting |
| Hao 2015       | NOD/SCID   | subcutaneous | 48% AC, 39% SQCC, 13% NE                                                           | NR              | 88 | 26 | patient | Tumours which reached 1.5cm <sup>3</sup>                                                                         |
| Zhang 2013     | SCID, nude | subcutaneous | 52% AC; 3% AC/SCC; 45% SCC                                                         | TN              | 31 | 45 | patient | first generation of mice                                                                                         |
| Zhuang 2017    | NCG        | subcutaneous | 44% AC; 33% SCC; 22% SQCC                                                          | NR              | 9  | 33 | patient | 500m <sup>3</sup> tumour                                                                                         |
| Bertolini 2009 | CD1 nude   | subcutaneous | 80% AC; 20% LCC                                                                    |                 | 29 | 34 | tissue  | NR                                                                                                               |

SCC = Small cell carcinoma; NSCLC = non-small cell lung cancer; AC = Adenocarcinoma; LCC = Large cell carcinoma; ASQC = Adenosquamous carcinoma; DC = ductal carcinoma; SQCC = squamous cell carcinoma; NE = neuroendocrine. CT = chemotherapy; RT = radiotherapy. TN = treatment naïve. Bold = studies with unclear concerns for model validity; grey shade = studies with high risk of concern for model validity.

D. Prostate PDX (primary tumours only, all tissue fragments)

| Study           | Mouse strain   | Engraftment site | Donor pathology    | Donor treatment                                                             | N sample | Outgrowth rate (%) | N       | Definition of outcome                                                  |
|-----------------|----------------|------------------|--------------------|-----------------------------------------------------------------------------|----------|--------------------|---------|------------------------------------------------------------------------|
| Priolo 2010     | nude, NOD/SCID | subrenal         | 100% AC            | TN                                                                          | 23       | 56                 | patient | grafts evaluated 3 months after grafting                               |
| Priolo 2010     | nude, NOD/SCID | orthotopic       | 100% AC            | TN                                                                          | 15       | 0                  | patient | grafts evaluated 3 months after grafting                               |
| Wang 2005       | NOD/SCID       | subrenal         | 100% AC            |                                                                             | 1        | 100                | patient | 60 or 90 days of growth                                                |
| Russell 2015    | nude           | subcutaneous     | 66% AC, 33% AC/SCC | 66% HT; 33% TN                                                              | 29       | 17                 | patient | 5–10 mm in diameter                                                    |
| Lawrence 2015   | NOD/SCID, NSG  | subrenal         | 20% HR, 80% CRPC   | ADT (100%) and either RT, CT, abiratarone or enzalutamide                   | 112      | 21                 | PDX     | 6-16 weeks growth                                                      |
| Lawrence 2015   | NOD/SCID, NSG  | subrenal         | 20% HR, 80% CRPC   | 100% had ADT and combinations of either RT, CT, abiratarone or enzalutamide | 10       | 70                 | patient | 6-16 weeks growth                                                      |
| Risbridger 2015 | NSG            | subrenal         | 100% G7            | HN                                                                          | 62       | 8                  | PDX     | Grafts with intraductal CAP evaluated between 6-14 wks after grafting. |
| Risbridger 2015 | NSG            | subrenal         | 100% G7            | HN                                                                          | 12       | 17                 | patient | Grafts with intraductal CAP evaluated between 6-14 wks after grafting  |

|                  |               |                        |                        |                  |     |      |         |                                                                      |
|------------------|---------------|------------------------|------------------------|------------------|-----|------|---------|----------------------------------------------------------------------|
| Risbridger 2015  | NSG           | subrenal               | 100% G7                | HN               | 62  | 71   | PDX     | Grafts with AC evaluated between 6-14 wks after grafting.            |
| Risbridger 2015  | NSG           | subrenal               | 100% G7                | HN               | 12  | 100  | patient | Grafts with AC evaluated between 6-14 wks after grafting             |
| Risbridger 2015* | NOD/SCID, NSG | subrenal               | 100% G7                | HN               | 191 | 43   | PDX     | grafts containing tumor foci                                         |
| Risbridger 2015* | NOD/SCID, NSG | subrenal               | 100% Gleason 7         | HN               | 12  | 100  | patient | grafts containing tumor foci                                         |
| Toivanen 2011    | NOD/SCID      | subrenal               | 100% G7                | NR               | 41  | 41   | PDX     | grafts containing tumor foci                                         |
| Toivanen 2011    | NOD/SCID      | subrenal               | 100% G7                | NR               | 6   | 67   | patient | grafts containing tumor foci                                         |
| Wetterauer 2015  | NSG, NOG      | subcutaneous, subrenal | 70% G7, 20% G9, 10% G8 | NR               | 27  | 37   | patient | Assessed 3 months after grafting. Rate includes lymphoma development |
| Pretlow 1993     | nude          | subcutaneous           | 50% G9, 25% G7, 25% G8 | NR               | 49  | 33   | PDX     | Tumors reaching a diameter of 4mm                                    |
| Pretlow 1993     | nude          | subcutaneous           | 50% G9, 25% G7, 25% G8 | NR               | 20  | 30   | patient | Tumors reaching a diameter of 4mm                                    |
| Presnell 2001    | nude          | subcutaneous           | 60% G6, 40% G8         | NR               | 5   | 100  | PDX     | Assessed 1 month after grafting                                      |
| Klein 1997       | SCID          | subcutaneous           | 66% T3, 33% T4         | 66% ADT          | 3   | 66   | patient | 2 to 3-fold increase in size                                         |
| Chen 2013        | NOD/SCID      | subrenal               | NR                     | TN               | 112 | 30   | PDX     | palpable tumour                                                      |
| Chen 2013        | Rag2          | subrenal               | NR                     | TN               | 2   | 100  | PDX     | palpable tumour                                                      |
| Chen 2013        | NOD/SCID      | subcutaneous           | NR                     | TN               | 228 | 69   | PDX     | palpable tumour                                                      |
| Chen 2013        | Rag2          | subcutaneous           | NR                     | TN               | 32  | 63   | PDX     | palpable tumour                                                      |
| Chen 2013        | NSG           | subcutaneous           | NR                     | TN               | 89  | 75   | PDX     | palpable tumour                                                      |
| Chen 2013        | NOD/SCID      | orthotopic             | NR                     | TN               | 55  | 18   | PDX     | palpable tumour                                                      |
| Yoshikawa 2016   | SCID          | subcutaneous, subrenal | NR                     | 100% ADT, CT, RT | 5   | 25   | PDX     | NR                                                                   |
| van Weerden 1996 | NMRI nude     | subcutaneous           | NR                     | 80% TN, 20% ADT  | 13  | 38.5 | patient | primary take rate                                                    |
| van Weerden 1996 | BALB/c nude   | subcutaneous           | NR                     | 80% TN, 20% ADT  | 25  | 0    | patient | primary take rate                                                    |

\*isolated cells. AC = adenocarcinoma; SCC = small cell carcinoma. G = Gleason grade; HR = hormone responsive; CRPC = castrate resistant prostate cancer; HN = hormone naïve; ADT = androgen deprivation therapy. TN = Treatment naïve. Bold = studies with unclear concerns for model validity; grey shade = studies with high risk of concern for model validity.
