# Supplementary material for: A systematic review of the validity of patient derived xenograft (PDX) models: the implications for translational research and personalised medicine
Source: PubMed Central journal article supplement (PMC6252062; doi:10.7717/peerj.5981), 2018-11-21
Supplement: peerj-06-5981-s008.pdf [file peerj-06-5981-s008.pdf]

**Supplemental Table S8:** Outgrowth rates for established PDX lines

A. Breast PDX (primary tumours only. Tissue fragments engrafted unless otherwise indicated)

| Study                  | Mouse strain      | Engraftment site | Donor pathology                                             | Donor treatment              | Take rate (%) | N stable lines | Definition of outcome                            |
|------------------------|-------------------|------------------|-------------------------------------------------------------|------------------------------|---------------|----------------|--------------------------------------------------|
| Fujii 2008             | NSG               | subcutaneous     | 100% DC                                                     | NR                           | 5             | 3              | >P3                                              |
| Shirakawa 2001         | Balb/c nude, SCID | subcutaneous     | High grade invasive DC (100%)                               | NR                           | 10            | 1              | reached p15                                      |
| Zhang 2013             | SCID/Bg           | orthotopic       | IDC (89%)                                                   | Previous treatment           | 13.6          | 23             | NR                                               |
| Bergamaschi 2009       | SCID              | subcutaneous     | IDC (76%); ILC (14%); MUC (10%)                             | NR                           | 10            | 3              | P1-P2. A diameter of approximately 15 mm.        |
| Charafe-Jauffret 2013* | NSG               | orthotopic       | IDC (83.2%); ILC (7%); mixed (1.4%); MED (1.4%); other (7%) | CT (76%); IR (80%); HT (55%) | 17.5          | 13             | maintained 13 PDXs through serial passages (>P4) |
| Patsialou 2012         | SCID              | orthotopic       | ILC (13%), IDC (87%)                                        | NR                           | 17            | 5              | >P1                                              |
| du Manoir 2014         | Swiss nude        | subcutaneous     | NR                                                          | NR                           | 15            | 19             | P3                                               |
| Eyre 2016              | NSG               | subcutaneous     | NR                                                          | RT (2%), CT (4%), HT (13%)   | 9             | 11             | >P2                                              |
| McAuliffe 2015         | Balb/c nude       | subcutaneous     | NR                                                          | Neoadjuvant therapy (50%)    | 27            | 13             | P3                                               |

Engrafted isolated cells. IDC = invasive ductal carcinoma; ILC = invasive lobular carcinoma; DC = ductal carcinoma; mets = metastases; AC = adenocarcinoma; inv= invasive; MUC = mucinous; MED = medullary. Bold = studies with unclear concerns for model validity; grey shade = studies with high risk of concern for model validity.

B. Colon PDX (primary tumours only. Tissue fragments engrafted unless otherwise indicated)

| Study            | Mouse strain | Engraftment site        | Donor pathology                          | Donor treatment | Take rate (%) | N stable lines | Definition of outcome |
|------------------|--------------|-------------------------|------------------------------------------|-----------------|---------------|----------------|-----------------------|
| Fujii 2008       | NSG          | subcutaneous            | 100% AC                                  | NR              | 35            | 17             | >P3                   |
| Chou 2013*       | NSG          | subrenal / subcutaneous | AC (65%), mAC (23%), AC/NE (5%), NE (5%) | CT (18%)        | 25            | 7              | >P2                   |
| Guan 2016        | Balb/c nude  | subcutaneous            | AC (89%), mAC (11%)                      |                 | 10            | 9              | reached P6            |
| Linnebacher 2010 | NOD/SCID     | subcutaneous            | AC (98%); LNEC (2%)                      | TN              | 23            | 11             | >P2                   |
| Julien 2012      | Swiss nude   | subcutaneous            | NR                                       | CT (23%)        | 41            | 24             | late pass             |
| Zhou 2011        | Balb/c nude  | subcutaneous            | AC (100%)                                | NR              | 14            | 3              | Reached P10           |

\* isolated cells. AC = adenocarcinoma; mAC=mucinous adenocarcinoma; CaG=carcinoma gingiva; Ca= carcinoid; LNEC = large cell neuroendocrine carcinoma; NE = neuroendocrine ; squamous cell carcinoma =SCC, combined small cell carcinoma =SCC; denosquamous =DS, pleomorphic carcinoma = PC. CT = chemotherapy. TN = treatment naïve. Bold = studies with unclear concerns for model validity.

C. Lung PDX (primary tumours only. Tissue fragments engrafted unless otherwise indicated )

| Study         | Mouse strain        | Engraftment site | Donor pathology                                                                    | Donor treatment                     | Take rate (%) | N Stable lines | Definition of outcome          |
|---------------|---------------------|------------------|------------------------------------------------------------------------------------|-------------------------------------|---------------|----------------|--------------------------------|
| Leong 2014*   | NSG                 | subcutaneous     | 100% SCLC                                                                          | NR                                  | 83            | 10             | Reached P2                     |
| Fujii 2008    | NSG                 | subcutaneous     | 100% SQCC                                                                          | NR                                  | 50            | 1              | >P3                            |
| Stewart 2015  | NOD/SCID            | subcutaneous     | 100% AC                                                                            | CT, EGFR Tyrosine Kinase inhibitors | 18            | 6              | P3                             |
| Cutz, 2006    | NOD/SCID            | subrenal         | 7% squamous metaplasia; 7% carcinoid; 35% SQCC; 14% AC; 21% SCC; 7% carcinosarcoma | 21% CT, 14% RT                      | 77            | 4              | >P5                            |
| Hao 2015      | NOD/SCID            | subcutaneous     | 48% AC, 39% SQCC, 13% NE                                                           | NR                                  | 9             | 8              | P3                             |
| Ma 2016       | NOD/SCID            | subcutaneous     | 72.1% AC; 21% SQCC; 2.3% LCC; 4.7% SCC                                             |                                     | 37            | 16             | >P2                            |
| Zhang 2013    | SCID, nude          | subcutaneous     | 52% AC; 3% AC/SCC; 45% SCC                                                         | Treatment naive                     | 32            | 10             | second generation mice         |
| Zhuang 2017   | NCG                 | subcutaneous     | 44% AC; 33% SCC; 22% SQCC                                                          | NR                                  | 22            | 2              | P2                             |
| Fichtner 2008 | NOD/SCID, NMRI nude | subcutaneous     | 48% SQCC; 24% AC; 16% carcinoma with pleiomorphic features, 12% LCC/SCC            | 16% CT or RT                        | 23            | 25             | passagable xenografts          |
| John 2011     | NOD/SCID            | subcutaneous     | 48% AC; 46% SQCC; 5% LCC; 1% sarcomatoid                                           | NR                                  | 40            | 63             | passaged at least once in vivo |

\* isolated cells. TF = tissue fragments. Small cell carcinoma (SCC); non-small cell lung cancer (NSCLC); Adenocarcinoma (AC); Large cell carcinoma (LCC); Adenosquamous carcinoma (ASQC); ductal carcinoma (DC); squamous cell carcinoma (SQCC); neuroendocrine (NE). Chemotherapy (CT); radiotherapy (RT). Bold = studies with unclear concerns for model validity; grey shade = studies with high risk of concern for model validity.

D. Prostate PDX (primary tumours only, all tissue fragments)

| Study            | Mouse strain | Engraftment site       | Donor pathology        | Take rate (%) | N Stable lines | Definition of outcome                       |
|------------------|--------------|------------------------|------------------------|---------------|----------------|---------------------------------------------|
| Lin 2013         | NOD/SCID     | subrenal               | 100% AC                | 31            | 5              | Serial transplantation (excludes lymphomas) |
| Wang 2005        | NOD/SCID     | subrenal               | 100% AC                | 100           | 1              | up to p5                                    |
| Russell 2015     | nude         | subcutaneous           | 66% AC, 33% AC/SCC     | 10            | 3              | >p2 (includes fibrosarcoma)                 |
| Pretlow 1993     | nude         | subcutaneous           | 50% G9, 25% G7, 25% G8 | 20            | 4              | P3                                          |
| Klein 1997       | SCID         | subcutaneous           | 66% T3, 33% T4         | 33            | 1              | >P4                                         |
| Yoshikawa 2016   | SCID         | subcutaneous, subrenal | NR                     | 25            | 1              | Serial transplantation                      |
| van Weerden 1996 | NMRI nude    | subcutaneous           | NR                     | 38.5          | 5              | stable lines                                |

|                   |             |                     |           |          |          |               |
|-------------------|-------------|---------------------|-----------|----------|----------|---------------|
| van Weerden 1996  | BALB/c nude | subcutaneous        | NR        | 0        | 0        | stable lines  |
| <b>Fujii 2008</b> | <b>NSG</b>  | <b>subcutaneous</b> | <b>NR</b> | <b>0</b> | <b>0</b> | <b>&gt;P3</b> |

AC = Adenocarcinoma; SCC = small cell carcinoma; G = Gleason grade. Bold = studies with unclear concerns for model validity; grey shade = studies with high risk of concern for model validity.
